# Supplementary material
Source: MDPI journal article supplement (https://www.mdpi.com/search?q=cancers-06-00179)
Supplement: s001 [file cancers-43698-Supplementary Tables S1-S3.xls]

## Sheet: Table S1
Supplementary Table 1: List of genes selected to validate the results of the array using PCR. Gene Symbol, name and array details are provided, as well as the association with cancer according to CaGE website [26]. PCRs consist of 40 cycles, with 60ºC as annealing temperature.
SYMBOL	Genename	FoldChange	mod_p_val	Database	Cancer association	Primer F	Primer R
28S	Homo sapiens 28S ribosomal RNA (LOC100008589), non-coding RNA.					TTGAAAATCCGGGGGAGAG	ACATTGTTCCAACATGCCAG
ANXA2P2	Homo sapiens annexin A2 pseudogene 2 (ANXA2P2), non-coding RNA.	1.0662	0.886304			TGTGGTGGAGACGACTGAAG	GTCTAGCTCTGTTGCCCAGG
AXL	Homo sapiens AXL receptor tyrosine kinase (AXL), transcript variant 1, mRNA	#N/A	#N/A	CGI	Human/Mouse: acute lymphocytic leukemia;acute myeloid leukemia;acute myeloid leukemia (aml);acute-lymphocytic leukemia;adenomas;aml;blast crisis;brain tumor;breast cancer;breast cancers;breast carcinomas;cancer;cancers;carcinogenesis;carcinoma;cervix carcinoma;chronic lymphocytic leukemia;chronic myelogeneous leukemia;chronic myelogenous leukemia;chronic myelogenous leukemia (cml);chronic myeloid…	GGGGGACGGGTCTGTGTCCA	ACCAGGGCCACGAGAAGGCA
BCL2*	Homo sapiens B-cell CLL/lymphoma 2 (BCL2), nuclear gene encoding mitochondrial protein, transcript variant alpha, mRNA.	1.1861	0.0221156	CGC	NHL, CLL/-	GGGAACACTGGTGGAGGATG	GCAATCCACTGTCACTCTTGC
BCL2L1	Homo sapiens BCL2-like 1 (BCL2L1), nuclear gene encoding mitochondrial protein, transcript variant 1, mRNA.	1.053	0.36995	CGI	Human/Mouse/Rat: abelson murine leukemia;acute leukemia;acute lymphoblastic leukaemia;acute lymphoblastic leukemia (all);acute myelogenous leukemia;acute myeloid leukaemia;acute myeloid leukemia;acute myelold leukemia (aml);adenocarcinoma;adenocarcinoma of the prostate;adenocarcinoma of the stomach;adenocarcinomas;adenomas;adenomatous polyps;adrenal tumors;adult acute myeloid leukemia;adult t-cel…	ACTCTTCCGGGATGGGGTAA	AGGTAAGTGGCCATCCAAGC
C9ORF100*	Homo sapiens chromosome 9 open reading frame 100 (C9orf100), mRNA.	1.163	0.00879046			ACTGATGTGCTCCTCATGGC	CCCTGCTGAGATGACACTGG
CAST	Homo sapiens calpastatin (CAST), transcript variant 9, mRNA.	1.052	0.446804	CGI	Human/Rat: acute lymphoblastic leukemia;acute lymphoblastic leukemia (all);breast tumors;colon tumor;colorectal adenocarcinoma;colorectal cancer;glioblastoma;hcc;human neuroblastoma;human t-cell leukemia;inflammatory bowel disease;lamb;malignant glioma;monocytic leukemia;myelocytic leukemia;necrosis;neuroblastoma;non-hodgkin&amp;apos;s lymphoma;solid tumor;tumor;tumors;tumour;	CCGCTGCTCCAGCTCCTGTG	CGGCTCAGGGGGTGCTGACT
CD58*	Homo sapiens CD58 molecule (CD58), mRNA.	1.1748	0.0307954	CGI	Dog/Human/Mouse/others: acquired immunodeficiency syndrome-related lymphomas (arls);acute leukemia;acute leukemia (al);acute lymphoblastic leukemia;acute lymphocytic leukemia;acute myeloid leukaemia;acute myeloid leukaemia (aml);acute myeloid leukemia;acute myeloid leukemia (aml);acute-lymphocytic leukemia;adult acute leukemia;all;aml;anll;apl;aplasia;autologous tumor;b cell lymphocytic leukemia;…	CCTCAGCGTGGTCTGCCTGC	AGGCACATTGCTTGGTACATGGAAA
CLDN11	Homo sapiens claudin 11 (oligodendrocyte transmembrane protein) (CLDN11), mRNA.	1.114	0.118701			ACCACCTCCACCAATGACTGGGT	GCAATCATCAGGGCGCGGCA
CLUAP1	Homo sapiens clusterin associated protein 1 (CLUAP1), transcript variant 1, mRNA.	1.1527	0.120292	CGI	Human: cancers;carcinogenesis;colon cancer;human osteosarcoma;lung cancers;osteosarcoma;tumor-associated antigen;	CATGCCTGTGGTCTCAGCTA	CTCACTCTGTCACCCAGGCT
CRK*	Homo sapiens v-crk sarcoma virus CT10 oncogene homolog (avian) (CRK), transcript variant II, mRNA.	1.1467	0.0219936	CGI	Human/others: avian sarcoma;bladder tumor;breast cancer;cancer;cancers;carcinoma;chronic myelogenous leukemia;epidermoid carcinoma;glioblastoma;glioma;hematopoietic cell proliferation;invasive carcinoma;lung adenocarcinomas;lung cancers;lung tumors;melanoma;men 2b;metastasis;multiple endocrine neoplasia type 2b;neuroblastoma;sarcomas;tumor;tumors;tumours;	GGGGTGTTCCTGGTGCGGGA	GGAGTCTGGAGGGGCTCACCC
CYB5B*	Homo sapiens cytochrome b5 type B (outer mitochondrial membrane) (CYB5B), nuclear gene encoding mitochondrial protein, mRNA.	-1.2465	0.00252225			GGAGGCTGAGGCTAGAGGAT	TTTTGAGACTGGGTCTCGCT
DENR*	Homo sapiens density-regulated protein (DENR), mRNA.	-1.166	0.0252843			TGTGACAAGAGTATGTGGCCT	CCCTGTTACTGAGGCACCAC
FOXO3*	Homo sapiens forkhead box O3 (FOXO3), transcript variant 2, mRNA.	1.1427	0.0707912	CGC	AL/-	GGTGCGTTGCGTGCCCTACT	GCGGCCACGGCTCTTGGTAT
GALNT1*	Homo sapiens UDP-N-acetyl-alpha-D-galactosamine:polypeptide N-acetylgalactosaminyltransferase 1 (GalNAc-T1) (GALNT1), mRNA.	-1.1607	0.0701134	CGI	Human/Mouse: human gastric cancer;tumor;tumors;	TGCCACCACCTAAAAGGCAACCA	AGCCACTGCTGGGACCGACT
GPR103	Homo sapiens G protein-coupled receptor 103 (GPR103), mRNA.	1.0893	0.208539			CTCCAGCACAAAGGCATGGA	AGAGCAAGATGTCGTTTGAGC
IL18	Homo sapiens interleukin 18 (interferon-gamma-inducing factor) (IL18), mRNA.	1.0215	0.94563	CGI	Dog/Human/Mouse/Rat/others: acute mixed lineage leukaemia;acute mixed lineage leukaemia (amll);acute mixed-lineage leukaemia;acute mixed-lineage leukaemia (amll);acute myeloid leukemia;acute myeloid leukemia (aml);acute t cell leukemia;acute t-cell leukemia;adenocarcinoma;adenoma;adult t-cell leukaemia;advanced breast cancers;advanced cancer;advanced ovarian cancer;aml;b cell lymphomas;b-cell chr…	CAACATGGTGAAACCTCATCTC	TGGAGTTTTGCTGTTGTTGC
ITIH5	Homo sapiens inter-alpha (globulin) inhibitor H5 (ITIH5), transcript variant 2, mRNA.	1.0478	0.552407	CGI	Human: breast cancer;breast tumors;invasive ductal carcinoma;	GACATCCCGGAGATGAGCTG	CAGGCAGCATCCAAGAGGAA
LAIR1	Homo sapiens leukocyte-associated immunoglobulin-like receptor 1 (LAIR1), transcript variant b, mRNA.	1.1315	0.840124	CGI	Human/Rat: acute myeloid leukemia;acute myeloid leukemia (aml);aml;human myeloid leukemias;leukemia;melanoma;rat basophilic leukemia (rbl);solid tumors;	TTGGTTGAGGCATTTCTGAGT	AATGAGATTCTGCCGCCTCC
LASS2*	Homo sapiens LAG1 homolog, ceramide synthase 2 (LASS2), transcript variant 1, mRNA.	-1.2721	0.00195184	CGI	Human: breast carcinoma;cancer;cancers;colon cancer;human hepatoma;human tumor;human tumors;metastasis;metastatic breast cancer;metastatic colon cancer;metastatic tumor;tumor;tumor metastasis;	TATCACGCTGCCCCTGGCCT	CCAACGCTCTACCTGGCGGC
LCN2*	Homo sapiens lipocalin 2 (LCN2), mRNA.	1.2462	0.0561554	CGI	Human/Mouse: adenocarcinoma;adenocarcinomas;adenocarcinomas of lung;basal-cell carcinoma;breast cancer;breast cancers;breast carcinoma;breast tumors;cancer;chondrosarcoma;cyst;esophageal carcinoma;hcc;hepatic tumors;human breast carcinoma;human colorectal cancer;inflammatory bowel disease;inflammatory bowel diseases;liver tumors;lung metastases;lymph-node metastases;lymphomas;malignancy;mcf-7 hum…	AGGCCTGGCAGGGAATGCAA	GAACTCGCCGGGCTGGCAAC
MSH3	Homo sapiens mutS homolog 3 (E. coli) (MSH3), mRNA.	-1.1541	0.655677	CGI	Human/Mouse: acute leukemia;adenocarcinoma;ampullary carcinomas;bladder cancer;bladder tumors;bladder tumours;cancer;cancer syndrome;cancers;cancers of the esophagus;carcinomas;childhood all;colon cancer;colorectal cancer;colorectal cancers;colorectal carcinomas;colorectal tumors;endometrial cancer;endometrial cancers;endometrial carcinoma;endometrial carcinomas;endometrial tumor;hcc;hematologica…	TAATCCCAGCACTTTGGGAG	CACCATGCCCAGCTAATTTT
NCOA6*	Homo sapiens nuclear receptor coactivator 6 (NCOA6), mRNA.	-1.1799	0.0660244	CGI	Human: breast cancer;breast cancers;cancers;liver cancer;stage i nsclc;tumor;tumors;	TCAGCCACCGTTGCCTGGAGA	AGAAGGATAACCTGGTGGCCGGT
PART1	PREDICTED: Homo sapiens prostate androgen-regulated transcript 1 (PART1), misc RNA	#N/A	#N/A	CGI	Human: androgen-dependent prostate cancer;cancer;prostate cancer;tumor;	TTAAGGCAGGAACTGGCAGG	CTGTGTTGTTCCAGTGCAGC
PTGS2	Homo sapiens prostaglandin-endoperoxide synthase 2 (prostaglandin G/H synthase and cyclooxygenase) (PTGS2), mRNA.	#N/A	#N/A	CGI	Cat/Dog/Human/Mouse/Rat: (malt) lymphoma;9l gliosarcoma;acinic cell carcinomas;acinic-cell carcinomas;actinic keratoses;actinic keratosis;acute myeloid leukemia;adenocarcinoma of the pancreas;adenocarcinomas;adenoma;adenomas;adenomatous polyps;adenosarcoma;adenosquamous carcinomas;adenosquamous cell carcinoma (ascc);adrenal tumors;adult solid tumors;aggressive fibromatosis;ampullary cancer;anapla…	TGAAACCCACTCCAAACACA	GAGAAGGCTTCCCAGCTTTT
RASA1	Homo sapiens RAS p21 protein activator (GTPase activating protein) 1 (RASA1), transcript variant 2, mRNA.	1.1064	0.214719	CGI	Human/Rat: aml;arteriovenous malformations;basal cell carcinomas (bcc);basal-cell carcinomas;bcc;breast cancer;cancer;carcinomas;choriocarcinomas;chronic eosinophilic leukaemia;chronic myelogenous leukemia;chronic myeloid leukaemia;hepatoma;human erythroleukemia;human lung cancer;human tumors;human tumours;hydatidiform moles;invasive moles;lung cancer;lung neoplasms;mammary gland carcinomas;myelo…	GGCAGGCAGGGAAGTCTGGC	GGCTCTGGTGGTGCAACTGGG
ROCK2	Homo sapiens Rho-associated, coiled-coil containing protein kinase 2 (ROCK2), mRNA.	-1.2673	0.135903	CGI	Human: benign prostate hyperplasia;benign prostate hyperplasia (bph);bph;cancers;colon cancer;colon cancers;human breast cancer;metastasis;neuroblastoma;primary tumor;solid tumors;testicular cancer;tumor;tumors;	AGCCTGCCCAACATAGTGAA	GAGTGCAGTGGCTCGATCTT
SHCBP1	Homo sapiens SHC SH2-domain binding protein 1 (SHCBP1), mRNA.	1.0083	0.980683			GGAGGCTGAGGCTAGAGGAT	TTTTGAGACTGGGTCTCGCT
ZMYM2	Homo sapiens zinc finger, MYM-type 2 (ZMYM2), mRNA.	-1.1525	0.35922	CGC	MPD, NHL/-	AACGTTGCAGAAGCAATCGG	GCGTGGGTACACTGCTACAA
* Within the top 300 most differentially expressed genes

## Sheet: Table S2
Supplementary Table 2. Correlation between transcripts for each sample. Grey areas represent correlation intragroups.
	NON CANCER						CANCER
n sample	1	4	5	6	50	51	16	18	19	31	46
1
4	0.47
5	0.39	0.38
6	0.45	0.44	0.42
50	0.07	0.06	0.22	0.12
51	-0.04	-0.06	0.09	0	0.4
16	0.07	0.07	0.24	0.11	0.52	0.42
18	0.15	0.14	0.26	0.19	0.33	0.27	0.31
19	0.45	0.42	0.41	0.44	0.11	0	0.12	0.17
31	0.42	0.42	0.37	0.41	0.12	-0.01	0.08	0.15	0.41
46	0.44	0.43	0.35	0.41	0.09	-0.01	0.06	0.12	0.43	0.43
		Min	Max	Aver	SD
	Cnt	-0.06	0.47	0.227333	0.199874
	Cancer	0.06	0.43	0.228	0.150687
	InterG	-0.01	0.52	0.268	0.166245

## Sheet: Table S3
Supplementary Table 2: Gene symbol, name and array details of those 300 transcripts that better discriminate both groups. This list of genes is plotted in the Supplementary Figure 2.
SYMBOL	Genename	FoldChange	mod_p_val	GO_Component	GO_Process	GO_Function
PNPLA8	Homo sapiens patatin-like phospholipase domain containing 8 (PNPLA8), mRNA.	-1.2606	0.000952054	The living contents of a cell; the matter contained within (but not including) the plasma membrane, usually taken to exclude large vacuoles and masses of secretory or ingested material. In eukaryotes it includes the nucleus and cytoplasm [goid 5622] [evidence ISS]; The living contents of a cell; the matter contained within (but not including) the plasma membrane, usually taken to exclude large va…	The chemical reactions and pathways involving fatty acids, aliphatic monocarboxylic acids liberated from naturally occurring fats and oils by hydrolysis [goid 6631] [evidence ISS]; The chemical reactions and pathways involving fatty acids, aliphatic monocarboxylic acids liberated from naturally occurring fats and oils by hydrolysis [goid 6631] [pmid 10744668] [evidence IDA]; The chemical reaction…	Catalysis of the reaction: 2-lysophosphatidylcholine + H2O = glycerophosphocholine + a carboxylate [goid 4622] [evidence IEA]; The selective, often stoichiometric, interaction of a molecule with one or more specific sites on another molecule [goid 5488] [evidence IEA]; Interacting selectively with ATP, adenosine 5'-triphosphate, a universally important coenzyme and enzyme regulator [goid 5524] [p…
SLC45A4	PREDICTED: Homo sapiens solute carrier family 45, member 4, transcript variant 2 (SLC45A4), mRNA.	-1.3286	0.00141175	Double layer of lipid molecules that encloses all cells, and, in eukaryotes, many organelles; may be a single or double lipid bilayer; also includes associated proteins [goid 16020] [evidence IEA]; Penetrating at least one phospholipid bilayer of a membrane. May also refer to the state of being buried in the bilayer with no exposure outside the bilayer. When used to describe a protein, indicates …	The directed movement of substances (such as macromolecules, small molecules, ions) into, out of, within or between cells, or within a multicellular organism [goid 6810] [evidence IEA]
LASS2	Homo sapiens LAG1 homolog, ceramide synthase 2 (LASS2), transcript variant 1, mRNA.	-1.2721	0.00195184	A membrane-bounded organelle of eukaryotic cells in which chromosomes are housed and replicated. In most cells, the nucleus contains all of the cell's chromosomes except the organellar chromosomes, and is the site of RNA synthesis and processing. In some species, or in specialized cell types, RNA metabolism or DNA replication may be absent [goid 5634] [evidence IEA]; The irregular network of unit…	Any process that modulates the frequency, rate or extent of DNA-dependent transcription [goid 6355] [evidence IEA]; The chemical reactions and pathways resulting in the formation of lipids, compounds soluble in an organic solvent but not, or sparingly, in an aqueous solvent [goid 8610] [evidence IEA]; Any process that modulates the frequency, rate or extent of DNA-dependent transcription [goid 63…	The function of binding to a specific DNA sequence in order to modulate transcription. The transcription factor may or may not also interact selectively with a protein or macromolecular complex [goid 3700] [evidence IEA]; Interacting selectively with any protein or protein complex (a complex of two or more proteins that may include other nonprotein molecules) [goid 5515] [pmid 17353931] [evidence…
CYB5B	Homo sapiens cytochrome b5 type B (outer mitochondrial membrane) (CYB5B), nuclear gene encoding mitochondrial protein, mRNA.	-1.2465	0.00252225	A semiautonomous, self replicating organelle that occurs in varying numbers, shapes, and sizes in the cytoplasm of virtually all eukaryotic cells. It is notably the site of tissue respiration [goid 5739] [evidence IEA]; The outer, i.e. cytoplasm-facing, lipid bilayer of the mitochondrial envelope [goid 5741] [evidence IEA]; The inner, i.e. lumen-facing, lipid bilayer of the mitochondrial envelope…	The directed movement of substances (such as macromolecules, small molecules, ions) into, out of, within or between cells, or within a multicellular organism [goid 6810] [evidence IEA]; A process whereby a series of electron carriers operate together to transfer electrons from donors to any of several different terminal electron acceptors to generate a transmembrane electrochemical gradient [goid…	Interacting selectively with iron (Fe) ions [goid 5506] [evidence IEA]; Interacting selectively with heme, any compound of iron complexed in a porphyrin (tetrapyrrole) ring [goid 20037] [evidence IEA]
LOC90624	Homo sapiens hypothetical protein LOC90624 (LOC90624), mRNA.	-1.2554	0.00291068
TMEM17	Homo sapiens transmembrane protein 17 (TMEM17), mRNA.	-1.245	0.00336758	Double layer of lipid molecules that encloses all cells, and, in eukaryotes, many organelles; may be a single or double lipid bilayer; also includes associated proteins [goid 16020] [evidence IEA]; Penetrating at least one phospholipid bilayer of a membrane. May also refer to the state of being buried in the bilayer with no exposure outside the bilayer. When used to describe a protein, indicates …
NPL	Homo sapiens N-acetylneuraminate pyruvate lyase (dihydrodipicolinate synthase) (NPL), mRNA.	-1.2312	0.00339223	All of the contents of a cell excluding the plasma membrane and nucleus, but including other subcellular structures [goid 5737] [evidence IEA]	The chemical reactions and pathways involving carbohydrates, any of a group of organic compounds based of the general formula Cx(H2O)y. Includes the formation of carbohydrate derivatives by the addition of a carbohydrate residue to another molecule [goid 5975] [evidence IEA]; The chemical reactions and pathways, including anabolism and catabolism, by which living organisms transform chemical subs…	Catalysis of the reaction: N-acetylneuraminate = N-acetyl-D-mannosamine + pyruvate [goid 8747] [evidence IEA]; Catalysis of the cleavage of C-C, C-O, C-N and other bonds by other means than by hydrolysis or oxidation, or conversely adding a group to a double bond. They differ from other enzymes in that two substrates are involved in one reaction direction, but only one in the other direction. Whe…
MIR610	Homo sapiens microRNA 610 (MIR610), microRNA.	1.312	0.00382137
LOC650003	PREDICTED: Homo sapiens hypothetical protein LOC650003 (LOC650003), mRNA.	1.2747	0.00410811
ABCB4	Homo sapiens ATP-binding cassette, sub-family B (MDR/TAP), member 4 (ABCB4), transcript variant C, mRNA.	1.258	0.004373	That fraction of cells, prepared by disruptive biochemical methods, that includes the plasma and other membranes [goid 5624] [pmid 7912658] [evidence TAS]; Penetrating at least one phospholipid bilayer of a plasma membrane. May also refer to the state of being buried in the bilayer with no exposure outside the bilayer [goid 5887] [pmid 7912658] [evidence TAS]; Double layer of lipid molecules that…	The chemical reactions and pathways involving lipids, compounds soluble in an organic solvent but not, or sparingly, in an aqueous solvent. Includes fatty acids; neutral fats, other fatty-acid esters, and soaps; long-chain (fatty) alcohols and waxes; sphingoids and other long-chain bases; glycolipids, phospholipids and sphingolipids; and carotenes, polyprenols, sterols, terpenes and other isopren…	Interacting selectively with a nucleotide, any compound consisting of a nucleoside that is esterified with (ortho)phosphate or an oligophosphate at any hydroxyl group on the ribose or deoxyribose moiety [goid 166] [evidence IEA]; Interacting selectively with ATP, adenosine 5'-triphosphate, a universally important coenzyme and enzyme regulator [goid 5524] [evidence IEA]; Catalysis of the reaction:…
LOC653471	PREDICTED: Homo sapiens similar to Ribosome biogenesis protein BMS1 homolog, transcript variant 7 (LOC653471), mRNA.	1.2628	0.00461075
ST6GALNAC3	Homo sapiens ST6 (alpha-N-acetyl-neuraminyl-2,3-beta-galactosyl-1, 3)-N-acetylgalactosaminide alpha-2,6-sialyltransferase 3 (ST6GALNAC3), mRNA.	-1.1973	0.00561387	The lipid bilayer surrounding any of the compartments of the Golgi apparatus [goid 139] [evidence IEA]; A compound membranous cytoplasmic organelle of eukaryotic cells, consisting of flattened, ribosome-free vesicles arranged in a more or less regular stack. The Golgi apparatus differs from the endoplasmic reticulum in often having slightly thicker membranes, appearing in sections as a characteri…	The addition of a sugar unit to a protein amino acid, e.g. the addition of glycan chains to proteins [goid 6486] [evidence IEA]; The addition of a sugar unit to a protein amino acid, e.g. the addition of glycan chains to proteins [goid 6486] [evidence IEA]; The addition of a sugar unit to a protein amino acid, e.g. the addition of glycan chains to proteins [goid 6486] [evidence IEA]	Catalysis of the formation of sialylglycoconjugates via transfer of the sialic acid group from CMP to one of several glycoconjugate acceptors [goid 8373] [evidence IEA]; Catalysis of the formation of sialylglycoconjugates via transfer of the sialic acid group from CMP to one of several glycoconjugate acceptors [goid 8373] [evidence IEA]; Catalysis of the formation of sialylglycoconjugates via tra…
LOC339742	PREDICTED: Homo sapiens hypothetical protein LOC339742 (LOC339742), mRNA.	-1.2607	0.00696263
LOC646813	PREDICTED: Homo sapiens similar to ATP-dependent RNA helicase A (Nuclear DNA helicase II) (NDH II) (DEAH box protein 9) (LOC646813), mRNA.	1.2193	0.00739333
PAPPA	Homo sapiens pregnancy-associated plasma protein A, pappalysin 1 (PAPPA), mRNA.	1.1999	0.00797279	Double layer of lipid molecules that encloses all cells, and, in eukaryotes, many organelles; may be a single or double lipid bilayer; also includes associated proteins [goid 16020] [evidence IEA]; The space external to the outermost structure of a cell. For cells without external protective or external encapsulating structures this refers to space outside of the plasma membrane. This term covers…	The process whereby relatively unspecialized cells, e.g. embryonic or regenerative cells, acquire specialized structural and/or functional features that characterize the cells, tissues, or organs of the mature organism or some other relatively stable phase of the organism's life history. Differentiation includes the processes involved in commitment of a cell to a specific fate [goid 30154] [evide…	Catalysis of the hydrolysis of internal, alpha-peptide bonds in a polypeptide chain [goid 4175] [evidence IEA]; Catalysis of the hydrolysis of internal, alpha-peptide bonds in a polypeptide chain [goid 4175] [evidence IEA]; Catalysis of the hydrolysis of a peptide bond. A peptide bond is a covalent bond formed when the carbon atom from the carboxyl group of one amino acid shares electrons with th…
C9ORF100	Homo sapiens chromosome 9 open reading frame 100 (C9orf100), mRNA.	1.163	0.00879046	The living contents of a cell; the matter contained within (but not including) the plasma membrane, usually taken to exclude large vacuoles and masses of secretory or ingested material. In eukaryotes it includes the nucleus and cytoplasm [goid 5622] [evidence IEA]	Any process that modulates the frequency, rate or extent of Rho protein signal transduction [goid 35023] [evidence IEA]	Stimulates the exchange of guanyl nucleotides by a GTPase. Under normal cellular physiological conditions, the concentration of GTP is higher than that of GDP, favoring the replacement of GDP by GTP in association with the GTPase [goid 5085] [evidence IEA]; Stimulates the exchange of guanyl nucleotides by a GTPase of the Rho family. Under normal cellular physiological conditions, the concentratio…
POU4F1	Homo sapiens POU class 4 homeobox 1 (POU4F1), mRNA.	1.2307	0.00883718	A membrane-bounded organelle of eukaryotic cells in which chromosomes are housed and replicated. In most cells, the nucleus contains all of the cell's chromosomes except the organellar chromosomes, and is the site of RNA synthesis and processing. In some species, or in specialized cell types, RNA metabolism or DNA replication may be absent [goid 5634] [evidence IEA]	Specific actions of a newborn or infant mammal that result in the derivation of nourishment from the breast [goid 1967] [evidence IEA]; Any process that modulates the frequency, rate or extent of transcription from an RNA polymerase II promoter [goid 6357] [pmid 8995448] [evidence TAS]; The biological process whose specific outcome is the progression of a multicellular organism over time from an …	The function of binding to a specific DNA sequence in order to modulate transcription. The transcription factor may or may not also interact selectively with a protein or macromolecular complex [goid 3700] [pmid 8995448] [evidence TAS]; Interacting selectively with any protein or protein complex (a complex of two or more proteins that may include other nonprotein molecules) [goid 5515] [evidence …
KIAA0133	Homo sapiens KIAA0133 (KIAA0133), mRNA.	-1.251	0.00918393	Double layer of lipid molecules that encloses all cells, and, in eukaryotes, many organelles; may be a single or double lipid bilayer; also includes associated proteins [goid 16020] [evidence IEA]; Penetrating at least one phospholipid bilayer of a membrane. May also refer to the state of being buried in the bilayer with no exposure outside the bilayer. When used to describe a protein, indicates …
SLC29A3	Homo sapiens solute carrier family 29 (nucleoside transporters), member 3 (SLC29A3), mRNA.	1.2344	0.00918442	Double layer of lipid molecules that encloses all cells, and, in eukaryotes, many organelles; may be a single or double lipid bilayer; also includes associated proteins [goid 16020] [evidence IEA]; Penetrating at least one phospholipid bilayer of a membrane. May also refer to the state of being buried in the bilayer with no exposure outside the bilayer. When used to describe a protein, indicates …	The directed movement of substances (such as macromolecules, small molecules, ions) into, out of, within or between cells, or within a multicellular organism [goid 6810] [evidence IEA]	Catalysis of the transfer of a nucleoside, a nucleobase linked to either beta-D-ribofuranose (ribonucleoside) or 2-deoxy-beta-D-ribofuranose, (a deoxyribonucleotide) from one side of a membrane to the other [goid 5337] [evidence IEA]
C15ORF43	Homo sapiens chromosome 15 open reading frame 43 (C15orf43), mRNA.	1.2055	0.00928691
TIRAP	Homo sapiens toll-interleukin 1 receptor (TIR) domain containing adaptor protein (TIRAP), transcript variant 1, mRNA.	-1.2338	0.00952594	All of the contents of a cell excluding the plasma membrane and nucleus, but including other subcellular structures [goid 5737] [evidence IEA]; The membrane surrounding a cell that separates the cell from its external environment. It consists of a phospholipid bilayer and associated proteins [goid 5886] [pmid 14625308] [evidence EXP]; The membrane surrounding a cell that separates the cell from i…	The immediate defensive reaction (by vertebrate tissue) to infection or injury caused by chemical or physical agents. The process is characterized by local vasodilation, extravasation of plasma into intercellular spaces and accumulation of white blood cells and macrophages [goid 6954] [evidence IEA]; The cascade of processes by which a signal interacts with a receptor, causing a change in the lev…	Combining with an extracellular or intracellular messenger to initiate a change in cell activity, and spanning to the membrane of either the cell or an organelle [goid 4888] [evidence IEA]; Interacting selectively with any protein or protein complex (a complex of two or more proteins that may include other nonprotein molecules) [goid 5515] [pmid 12721283] [evidence IPI]; Interacting selectively w…
HS.437760	UI-H-BI2-agv-g-07-0-UI.s1 NCI_CGAP_Sub4 Homo sapiens cDNA clone IMAGE:2725813 3, mRNA sequence	-1.2518	0.00992599
SOCS7	Homo sapiens suppressor of cytokine signaling 7 (SOCS7), mRNA.	-1.2003	0.0103382	The part of a cell or its extracellular environment in which a gene product is located. A gene product may be located in one or more parts of a cell and its location may be as specific as a particular macromolecular complex, that is, a stable, persistent association of macromolecules that function together [goid 5575] [evidence ND ]; All of the contents of a cell excluding the plasma membrane and…	Any process that modulates the frequency, rate or extent of cell growth [goid 1558] [evidence IEA]; The chemical reactions and pathways resulting in the breakdown of a protein or peptide by hydrolysis of its peptide bonds, initiated by the covalent attachment of a ubiquitin moiety, or multiple ubiquitin moieties, to the protein [goid 6511] [evidence IEA]; A series of reactions within the cell tha…	Interacting selectively with any protein or protein complex (a complex of two or more proteins that may include other nonprotein molecules) [goid 5515] [pmid 17803907] [evidence IPI]; Interacting selectively with a SH3 domain (Src homology 3) of a protein, small protein modules containing approximately 50 amino acid residues found in a great variety of intracellular or membrane-associated protein…
MME	Homo sapiens membrane metallo-endopeptidase (MME), transcript variant 1, mRNA.	-1.2451	0.0104512	Double layer of lipid molecules that encloses all cells, and, in eukaryotes, many organelles; may be a single or double lipid bilayer; also includes associated proteins [goid 16020] [evidence IEA]; The membrane surrounding a cell that separates the cell from its external environment. It consists of a phospholipid bilayer and associated proteins [goid 5886] [pmid 1660144] [evidence TAS]; Penetrati…	The hydrolysis of a peptide bond or bonds within a protein [goid 6508] [evidence IEA]; The hydrolysis of a peptide bond or bonds within a protein [goid 6508] [pmid 1660144] [evidence TAS]; Any process that mediates the transfer of information from one cell to another [goid 7267] [pmid 2521388] [evidence TAS]	Catalysis of the hydrolysis of internal, alpha-peptide bonds in a polypeptide chain by a mechanism in which water acts as a nucleophile, one or two metal ions hold the water molecule in place, and charged amino acid side chains are ligands for the metal ions [goid 4222] [evidence IEA]; Catalysis of the hydrolysis of internal, alpha-peptide bonds in a polypeptide chain by a mechanism in which wate…
LOC730525	PREDICTED: Homo sapiens hypothetical protein LOC730525 (LOC730525), mRNA.	1.2156	0.0105642
C8ORF38	Homo sapiens chromosome 8 open reading frame 38 (C8orf38), mRNA.	1.2003	0.0118609
C4BPB	Homo sapiens complement component 4 binding protein, beta (C4BPB), transcript variant 3, mRNA.	-1.2497	0.0121706	The space external to the outermost structure of a cell. For cells without external protective or external encapsulating structures this refers to space outside of the plasma membrane. This term covers the host cell environment outside an intracellular parasite [goid 5576] [pmid 14718574] [evidence NAS]	Any process involved in the activation of any of the steps of the classical pathway of the complement cascade which allows for the direct killing of microbes, the disposal of immune complexes, and the regulation of other immune processes [goid 6958] [evidence IEA]; The sequential process by which the multiple coagulation factors of the blood interact, ultimately resulting in the formation of an i…
STGC3	PREDICTED: Homo sapiens hypothetical STGC3 (STGC3), misc RNA.	-1.2105	0.0126765
FLJ41821	Homo sapiens FLJ41821 protein (FLJ41821), mRNA.	-1.1746	0.0127144
LOC652183	PREDICTED: Homo sapiens hypothetical LOC652183 (LOC652183), mRNA.	-1.1921	0.012923
RGS3	Homo sapiens regulator of G-protein signaling 3 (RGS3), transcript variant 6, mRNA.	-1.164	0.01362	A membrane-bounded organelle of eukaryotic cells in which chromosomes are housed and replicated. In most cells, the nucleus contains all of the cell's chromosomes except the organellar chromosomes, and is the site of RNA synthesis and processing. In some species, or in specialized cell types, RNA metabolism or DNA replication may be absent [goid 5634] [evidence IEA]; All of the contents of a cell…	Any process that terminates the activity of the active enzyme MAP kinase [goid 188] [pmid 8602223] [evidence TAS]; Any process that modulates the frequency, rate or extent of G-protein coupled receptor protein signaling pathway activity [goid 8277] [pmid 9858594] [evidence TAS]; Any process that stops, prevents or reduces the frequency, rate or extent of signal transduction [goid 9968] [evidence …	Mediates the transfer of a signal from the outside to the inside of a cell by means other than the introduction of the signal molecule itself into the cell [goid 4871] [evidence IEA]; Mediates the transfer of a signal from the outside to the inside of a cell by means other than the introduction of the signal molecule itself into the cell [goid 4871] [evidence IEA]; Mediates the transfer of a sign…
HS.567096	UI-E-CL1-afa-l-14-0-UI.s1 UI-E-CL1 Homo sapiens cDNA clone UI-E-CL1-afa-l-14-0-UI 3, mRNA sequence	1.1875	0.0149081
LOC642864	PREDICTED: Homo sapiens hypothetical protein LOC642864 (LOC642864), mRNA.	1.2255	0.0151989
ZNF540	Homo sapiens zinc finger protein 540 (ZNF540), mRNA.	1.4235	0.0161264	The living contents of a cell; the matter contained within (but not including) the plasma membrane, usually taken to exclude large vacuoles and masses of secretory or ingested material. In eukaryotes it includes the nucleus and cytoplasm [goid 5622] [evidence IEA]; A membrane-bounded organelle of eukaryotic cells in which chromosomes are housed and replicated. In most cells, the nucleus contains …	The synthesis of either RNA on a template of DNA or DNA on a template of RNA [goid 6350] [evidence IEA]; Any process that modulates the frequency, rate or extent of DNA-dependent transcription [goid 6355] [evidence IEA]	Interacting selectively with DNA (deoxyribonucleic acid) [goid 3677] [evidence IEA]; Interacting selectively with zinc (Zn) ions [goid 8270] [evidence IEA]; Interacting selectively with any metal ion [goid 46872] [evidence IEA]
LY6G6F	Homo sapiens lymphocyte antigen 6 complex, locus G6F (LY6G6F), mRNA.	-1.218	0.0163548	The membrane surrounding a cell that separates the cell from its external environment. It consists of a phospholipid bilayer and associated proteins [goid 5886] [evidence IEA]; Penetrating at least one phospholipid bilayer of a membrane. May also refer to the state of being buried in the bilayer with no exposure outside the bilayer. When used to describe a protein, indicates that all or part of t…
PIF1	Homo sapiens PIF1 5'-to-3' DNA helicase homolog (S. cerevisiae) (PIF1), mRNA.	-1.2058	0.0165445	The terminal region of a linear chromosome in the nucleus that includes the telomeric DNA repeats and associated proteins [goid 784] [pmid 16522649] [evidence IDA]; A membrane-bounded organelle of eukaryotic cells in which chromosomes are housed and replicated. In most cells, the nucleus contains all of the cell's chromosomes except the organellar chromosomes, and is the site of RNA synthesis and…	Any process that modulates the frequency, rate or extent of a process that affects and monitors the activity of telomeric proteins and the length of telomeric DNA [goid 32204] [pmid 16522649] [evidence IDA]; Any process that stops or reduces the activity of the enzyme telomerase, which catalyzes of the reaction: deoxynucleoside triphosphate + DNA(n) = diphosphate + DNA(n+1) [goid 51974] [pmid 165…	Interacting selectively with a nucleotide, any compound consisting of a nucleoside that is esterified with (ortho)phosphate or an oligophosphate at any hydroxyl group on the ribose or deoxyribose moiety [goid 166] [evidence IEA]; Interacting selectively with magnesium (Mg) ions [goid 287] [pmid 16522649] [evidence IDA]; Interacting selectively with DNA (deoxyribonucleic acid) [goid 3677] [evidenc…
HS.566484	wx20a11.x1 NCI_CGAP_Gas4 Homo sapiens cDNA clone IMAGE:2544188 3 similar to contains L1.t1 L1 L1 repetitive element ;, mRNA sequence	1.2323	0.0165656
LOC399715	PREDICTED: Homo sapiens FLJ46311 protein (LOC399715), mRNA.	1.1758	0.017114
FRAS1	Homo sapiens Fraser syndrome 1 (FRAS1), transcript variant 3, mRNA.	1.166	0.0172227	A thin layer of dense material found in various animal tissues interposed between the cells and the adjacent connective tissue. It consists of the basal lamina plus an associated layer of reticulin fibers [goid 5604] [evidence IEA]; The membrane surrounding a cell that separates the cell from its external environment. It consists of a phospholipid bilayer and associated proteins [goid 5886] [evid…	The process by which the anatomical structures of epithelia are generated and organized. Morphogenesis pertains to the creation of form. An epithelium consists of closely packed cells arranged in one or more layers, that covers the outer surfaces of the body or lines any internal cavity or tube [goid 2009] [evidence IEA]; Any process that mediates interactions between a cell and its surroundings.…	Interacting selectively with calcium ions (Ca2+) [goid 5509] [evidence IEA]; Interacting selectively with any protein or protein complex (a complex of two or more proteins that may include other nonprotein molecules) [goid 5515] [evidence IEA]
CABP2	Homo sapiens calcium binding protein 2 (CABP2), transcript variant 2, mRNA.	-1.2518	0.0175144		The cascade of processes by which a signal interacts with a receptor, causing a change in the level or activity of a second messenger or other downstream target, and ultimately effecting a change in the functioning of the cell [goid 7165] [pmid 10625670] [evidence TAS]	Interacting selectively with calcium ions (Ca2+) [goid 5509] [pmid 10625670] [evidence TAS]
HVCN1	Homo sapiens hydrogen voltage-gated channel 1 (HVCN1), transcript variant 1, mRNA.	-1.2132	0.0176982	Double layer of lipid molecules that encloses all cells, and, in eukaryotes, many organelles; may be a single or double lipid bilayer; also includes associated proteins [goid 16020] [evidence IEA]; Penetrating at least one phospholipid bilayer of a membrane. May also refer to the state of being buried in the bilayer with no exposure outside the bilayer. When used to describe a protein, indicates …	The directed movement of charged atoms or small charged molecules into, out of, within or between cells [goid 6811] [evidence IEA]; A change in state or activity of a cell or an organism (in terms of movement, secretion, enzyme production, gene expression, etc.) as a result of a pH stimulus [goid 9268] [pmid 16556803] [evidence ISS]; A change in state or activity of a cell or an organism (in term…	Catalysis of the transmembrane transfer of an ion by a voltage-gated channel. An ion is an atom or group of atoms carrying an electric charge by virtue of having gained or lost one or more electrons [goid 5244] [evidence IEA]; Catalysis of the transmembrane transfer of a proton by a voltage-gated channel [goid 30171] [pmid 16556803] [evidence ISS]; Catalysis of the transmembrane transfer of a pro…
SORT1	Homo sapiens sortilin 1 (SORT1), mRNA.	-1.2039	0.0184526	A membrane-bounded organelle of eukaryotic cells in which chromosomes are housed and replicated. In most cells, the nucleus contains all of the cell's chromosomes except the organellar chromosomes, and is the site of RNA synthesis and processing. In some species, or in specialized cell types, RNA metabolism or DNA replication may be absent [goid 5634] [evidence IEA]; The lipid bilayer surrounding…	The formation of bone or of a bony substance, or the conversion of fibrous tissue or of cartilage into bone or a bony substance [goid 1503] [evidence IEA]; The directed movement of substances (such as macromolecules, small molecules, ions) into, out of, within or between cells, or within a multicellular organism [goid 6810] [evidence IEA]; The directed movement of substances from the Golgi to ear…	Combining with an extracellular or intracellular messenger to initiate a change in cell activity [goid 4872] [evidence IEA]; Enables the directed movement of oxygen into, out of, within or between cells [goid 5344] [evidence IEA]; Combining with nerve growth factor, to block apoptosis in neurons and promote nerve growth, or to initiate a change in cell activity [goid 10465] [pmid 14985763] [evide…
LOC653107	PREDICTED: Homo sapiens similar to Annexin A8 (Annexin VIII) (Vascular anticoagulant-beta) (VAC-beta), transcript variant 2 (LOC653107), mRNA.	-1.2164	0.0190464
EXOC6	Homo sapiens exocyst complex component 6 (EXOC6), transcript variant 2, mRNA.	1.2176	0.0191333
MST1	Homo sapiens macrophage stimulating 1 (hepatocyte growth factor-like) (MST1), mRNA.	1.1798	0.0195261	The space external to the outermost structure of a cell. For cells without external protective or external encapsulating structures this refers to space outside of the plasma membrane. This term covers the host cell environment outside an intracellular parasite [goid 5576] [evidence IEA]	The hydrolysis of a peptide bond or bonds within a protein [goid 6508] [evidence IEA]; The sequential process by which the multiple coagulation factors of the blood interact, ultimately resulting in the formation of an insoluble fibrin clot; it may be divided into three stages: stage 1, the formation of intrinsic and extrinsic prothrombin converting principle; stage 2, the formation of thrombin; …	Catalysis of a biochemical reaction at physiological temperatures. In biologically catalyzed reactions, the reactants are known as substrates, and the catalysts are naturally occurring macromolecular substances known as enzymes. Enzymes possess specific binding sites for substrates, and are usually composed wholly or largely of protein, but RNA that has catalytic activity (ribozyme) is often also…
LOC644624	PREDICTED: Homo sapiens hypothetical LOC644624, transcript variant 1 (LOC644624), mRNA.	1.1547	0.020074
SLC35B4	Homo sapiens solute carrier family 35, member B4 (SLC35B4), mRNA.	1.201	0.0203155	The lipid bilayer surrounding any of the compartments of the Golgi apparatus [goid 139] [evidence IEA]; A compound membranous cytoplasmic organelle of eukaryotic cells, consisting of flattened, ribosome-free vesicles arranged in a more or less regular stack. The Golgi apparatus differs from the endoplasmic reticulum in often having slightly thicker membranes, appearing in sections as a characteri…	The directed movement of nucleotide-sugars into, out of, within or between cells. Nucleotide-sugars are any nucleotide in which the distal phosphoric residue of a nucleoside 5'-diphosphate is in glycosidic linkage with a monosaccharide or monosaccharide derivative [goid 15780] [evidence IEA]; The directed movement of UDP-N-acetylglucosamine into, out of, within or between cells. N-acetylglucosami…	Catalysis of the transfer of a nucleotide-sugar from one side of the membrane to the other. A nucleotide-sugar is any nucleotide in which the distal phosphoric residue of a nucleoside 5'-diphosphate is in glycosidic linkage with a monosaccharide or monosaccharide derivative [goid 5338] [evidence IEA]; Catalysis of the transfer of a solute or solutes from one side of a membrane to the other accord…
LOC440080	PREDICTED: Homo sapiens similar to cDNA sequence BC048546, transcript variant 7 (LOC440080), mRNA.	1.1605	0.0204703
TAGLN	Homo sapiens transgelin (TAGLN), transcript variant 1, mRNA.	-1.178	0.0207143	All of the contents of a cell excluding the plasma membrane and nucleus, but including other subcellular structures [goid 5737] [evidence IEA]	The process whose specific outcome is the progression of the muscle over time, from its formation to the mature structure. The muscle is an organ consisting of a tissue made up of various elongated cells that are specialized to contract and thus to produce movement and mechanical work [goid 7517] [pmid 9615232] [evidence TAS]	Interacting selectively with monomeric or multimeric forms of actin, including actin filaments [goid 3779] [evidence IEA]; Interacting selectively with any protein or protein complex (a complex of two or more proteins that may include other nonprotein molecules) [goid 5515] [pmid 17353931] [evidence IPI]
HS.116870	602663235F1 NIH_MGC_59 Homo sapiens cDNA clone IMAGE:4808457 5, mRNA sequence	1.2491	0.0212103
TRADD	Homo sapiens TNFRSF1A-associated via death domain (TRADD), transcript variant 1, mRNA.	-1.2327	0.0212574	All of the contents of a cell excluding the plasma membrane and nucleus, but including other subcellular structures [goid 5737] [pmid 11684708] [evidence IDA]; That part of the cytoplasm that does not contain membranous or particulate subcellular components [goid 5829] [pmid 7758105] [evidence EXP]; That part of the cytoplasm that does not contain membranous or particulate subcellular components …	A form of programmed cell death induced by external or internal signals that trigger the activity of proteolytic caspases, whose actions dismantle the cell and result in cell death. Apoptosis begins internally with condensation and subsequent fragmentation of the cell nucleus (blebbing) while the plasma membrane remains intact. Other characteristics of apoptosis include DNA fragmentation and the …	Mediates the transfer of a signal from the outside to the inside of a cell by means other than the introduction of the signal molecule itself into the cell [goid 4871] [evidence IEA]; Interacting selectively with an intermediate filament, a distinct elongated structure, characteristically 10 nm in diameter, that occurs in the cytoplasm of higher eukaryotic cells. Intermediate filaments form a fib…
CRK	Homo sapiens v-crk sarcoma virus CT10 oncogene homolog (avian) (CRK), transcript variant II, mRNA.	1.1467	0.0219936	A membrane-bounded organelle of eukaryotic cells in which chromosomes are housed and replicated. In most cells, the nucleus contains all of the cell's chromosomes except the organellar chromosomes, and is the site of RNA synthesis and processing. In some species, or in specialized cell types, RNA metabolism or DNA replication may be absent [goid 5634] [pmid 10748058] [evidence TAS]; All of the co…	Any process that modulates the frequency, rate or extent of transcription from an RNA polymerase II promoter [goid 6357] [pmid 10748058] [evidence TAS]; A series of reactions within the cell that occur as a result of a single trigger reaction or compound [goid 7242] [pmid 9069267] [evidence EXP]; A process that is carried out at the cellular level which results in the formation, arrangement of co…	Interacting selectively with any protein or protein complex (a complex of two or more proteins that may include other nonprotein molecules) [goid 5515] [evidence IEA]; Interacting selectively with any protein or protein complex (a complex of two or more proteins that may include other nonprotein molecules) [goid 5515] [evidence IEA]; Interacting selectively with any protein or protein complex (a …
BCL2	Homo sapiens B-cell CLL/lymphoma 2 (BCL2), nuclear gene encoding mitochondrial protein, transcript variant alpha, mRNA.	1.1861	0.0221156	A membrane-bounded organelle of eukaryotic cells in which chromosomes are housed and replicated. In most cells, the nucleus contains all of the cell's chromosomes except the organellar chromosomes, and is the site of RNA synthesis and processing. In some species, or in specialized cell types, RNA metabolism or DNA replication may be absent [goid 5634] [evidence IEA]; All of the contents of a cell…	The process by which cytochrome c is enabled to move from the mitochondrial intermembrane space into the cytosol, which is an early step in apoptosis and leads to caspase activation [goid 1836] [evidence IEA]; The process by which cytochrome c is enabled to move from the mitochondrial intermembrane space into the cytosol, which is an early step in apoptosis and leads to caspase activation [goid 1…	Interacting selectively with any protease or peptidase [goid 2020] [pmid 10620603] [evidence IDA]; Interacting selectively with any protein or protein complex (a complex of two or more proteins that may include other nonprotein molecules) [goid 5515] [evidence IEA]; Interacting selectively with an identical protein to form a homodimer [goid 42803] [pmid 9111042] [evidence IDA]; Interacting select…
HS.539160	zh93f04.s1 Soares_fetal_liver_spleen_1NFLS_S1 Homo sapiens cDNA clone IMAGE:428863 3, mRNA sequence	-1.2971	0.0222157
MGC51338	PREDICTED: Homo sapiens hypothetical gene supported by BC042812 (MGC51338), mRNA.	-1.1963	0.0226441
HS.129636	BX109290 NCI_CGAP_Br2 Homo sapiens cDNA clone IMAGp998A244082, mRNA sequence	-1.1783	0.0231502
NCRNA00161	Homo sapiens non-protein coding RNA 161 (NCRNA00161), non-coding RNA.	-1.1756	0.0235282
ZNF566	Homo sapiens zinc finger protein 566 (ZNF566), mRNA.	1.2008	0.0235572	The living contents of a cell; the matter contained within (but not including) the plasma membrane, usually taken to exclude large vacuoles and masses of secretory or ingested material. In eukaryotes it includes the nucleus and cytoplasm [goid 5622] [evidence IEA]; A membrane-bounded organelle of eukaryotic cells in which chromosomes are housed and replicated. In most cells, the nucleus contains …	The synthesis of either RNA on a template of DNA or DNA on a template of RNA [goid 6350] [evidence IEA]; Any process that modulates the frequency, rate or extent of DNA-dependent transcription [goid 6355] [evidence IEA]	Interacting selectively with DNA (deoxyribonucleic acid) [goid 3677] [evidence IEA]; Interacting selectively with zinc (Zn) ions [goid 8270] [evidence IEA]; Interacting selectively with any metal ion [goid 46872] [evidence IEA]
VCX2	Homo sapiens variable charge, X-linked 2 (VCX2), mRNA.	-1.1694	0.0235843	The part of a cell or its extracellular environment in which a gene product is located. A gene product may be located in one or more parts of a cell and its location may be as specific as a particular macromolecular complex, that is, a stable, persistent association of macromolecules that function together [goid 5575] [evidence ND ]	Any process specifically pertinent to the functioning of integrated living units: cells, tissues, organs, and organisms. A process is a collection of molecular events with a defined beginning and end [goid 8150] [evidence ND ]	Elemental activities, such as catalysis or binding, describing the actions of a gene product at the molecular level. A given gene product may exhibit one or more molecular functions [goid 3674] [evidence ND ]
FLJ43950	PREDICTED: Homo sapiens FLJ43950 protein (FLJ43950), mRNA.	1.1558	0.0236951
HS.554319	AV732571 HTF Homo sapiens cDNA clone HTFBKE09 5, mRNA sequence	-1.1644	0.0237443
LOC652436	PREDICTED: Homo sapiens similar to tripartite motif protein 39 (LOC652436), mRNA.	-1.1421	0.0242
ARL6	Homo sapiens ADP-ribosylation factor-like 6 (ARL6), transcript variant 2, mRNA.	-1.1767	0.0250163	The living contents of a cell; the matter contained within (but not including) the plasma membrane, usually taken to exclude large vacuoles and masses of secretory or ingested material. In eukaryotes it includes the nucleus and cytoplasm [goid 5622] [evidence IEA]; All of the contents of a cell excluding the plasma membrane and nucleus, but including other subcellular structures [goid 5737] [evid…	Any series of molecular signals in which a small monomeric GTPase relays one or more of the signals [goid 7264] [evidence IEA]; The establishment of an organism's body plan or part of an organism with respect to the left and right halves. The pattern can either be symmetric, such that the halves are mirror images, or asymmetric where the pattern deviates from this symmetry [goid 7368] [evidence I…	Interacting selectively with a nucleotide, any compound consisting of a nucleoside that is esterified with (ortho)phosphate or an oligophosphate at any hydroxyl group on the ribose or deoxyribose moiety [goid 166] [evidence IEA]; Interacting selectively with any protein or protein complex (a complex of two or more proteins that may include other nonprotein molecules) [goid 5515] [evidence ISS]; I…
LOC390205	PREDICTED: Homo sapiens similar to Serdin1 (LOC390205), mRNA.	1.2155	0.0252791
DENR	Homo sapiens density-regulated protein (DENR), mRNA.	-1.166	0.0252843	The part of a cell or its extracellular environment in which a gene product is located. A gene product may be located in one or more parts of a cell and its location may be as specific as a particular macromolecular complex, that is, a stable, persistent association of macromolecules that function together [goid 5575] [evidence ND ]	The process preceding formation of the peptide bond between the first two amino acids of a protein. This includes the formation of a complex of the ribosome, mRNA, and an initiation complex that contains the first aminoacyl-tRNA [goid 6413] [evidence IEA]; Any process specifically pertinent to the functioning of integrated living units: cells, tissues, organs, and organisms. A process is a collec…	Elemental activities, such as catalysis or binding, describing the actions of a gene product at the molecular level. A given gene product may exhibit one or more molecular functions [goid 3674] [evidence ND ]; Functions in the initiation of ribosome-mediated translation of mRNA into a polypeptide [goid 3743] [evidence IEA]
HBBP1	Homo sapiens hemoglobin, beta pseudogene 1 (HBBP1), non-coding RNA.	1.2058	0.0253587
PEX13	Homo sapiens peroxisome biogenesis factor 13 (PEX13), mRNA.	-1.1814	0.0255081	That fraction of cells, prepared by disruptive biochemical methods, that includes the plasma and other membranes [goid 5624] [pmid 8858165] [evidence IDA]; A small, membrane-bounded organelle that uses dioxygen (O2) to oxidize organic molecules; contains some enzymes that produce and others that degrade hydrogen peroxide (H2O2) [goid 5777] [evidence IEA]; The lipid bilayer surrounding a peroxisom…	Pathway by which 3-methyl branched fatty acids are degraded. These compounds are not degraded by the normal peroxisomal beta-oxidation pathway, because the 3-methyl blocks the dehydrogenation of the hydroxyl group by hydroxyacyl-CoA dehydrogenase. The 3-methyl branched fatty acid is converted in several steps to pristenic acid, which can then feed into the beta-oxidative pathway [goid 1561] [evid…	Interacting selectively with any protein or protein complex (a complex of two or more proteins that may include other nonprotein molecules) [goid 5515] [pmid 9653144] [evidence IPI]; Interacting selectively with any protein or protein complex (a complex of two or more proteins that may include other nonprotein molecules) [goid 5515] [pmid 8858165] [evidence IPI]; Interacting selectively with any …
MGC33948	Homo sapiens hypothetical protein MGC33948 (MGC33948), mRNA.	-1.1977	0.025782
YES1	Homo sapiens v-yes-1 Yamaguchi sarcoma viral oncogene homolog 1 (YES1), mRNA.	1.1846	0.025912	All of the contents of a cell excluding the plasma membrane and nucleus, but including other subcellular structures [goid 5737] [evidence IEA]	The covalent alteration of one or more amino acids occurring in proteins, peptides and nascent polypeptides (co-translational, post-translational modifications). Includes the modification of charged tRNAs that are destined to occur in a protein (pre-translation modification) [goid 6464] [pmid 2436037] [evidence TAS]; The process of introducing a phosphate group on to a protein [goid 6468] [eviden…	Interacting selectively with a nucleotide, any compound consisting of a nucleoside that is esterified with (ortho)phosphate or an oligophosphate at any hydroxyl group on the ribose or deoxyribose moiety [goid 166] [evidence IEA]; Catalysis of the reaction: ATP + a protein-L-tyrosine = ADP + a protein-L-tyrosine phosphate [goid 4715] [evidence IEA]; Interacting selectively with any protein or prot…
HS.270824	IL-BT103-280199-005 BT103 Homo sapiens cDNA, mRNA sequence	-1.1722	0.0260035
HS.576243	DA276856 BRCOC2 Homo sapiens cDNA clone BRCOC2003969 5, mRNA sequence	1.1421	0.0261548
WDR87	PREDICTED: Homo sapiens WD repeat domain 87 (WDR87), mRNA.	-1.1415	0.027227			The selective, often stoichiometric, interaction of a molecule with one or more specific sites on another molecule [goid 5488] [evidence IEA]
HS.445179	hi12a04.x1 NCI_CGAP_GU1 Homo sapiens cDNA clone IMAGE:2972046 3, mRNA sequence	-1.1704	0.0275423
LOC148003	PREDICTED: Homo sapiens similar to Galactoside-binding soluble lectin 13 (Placental tissue protein 13) (Placenta protein 13) (PP13) (Galectin-13), transcript variant 1 (LOC148003), mRNA.	-1.2131	0.0276625
TSPYL2	PREDICTED: Homo sapiens TSPY-like 2, transcript variant 3 (TSPYL2), mRNA.	-1.1439	0.0280685	A membrane-bounded organelle of eukaryotic cells in which chromosomes are housed and replicated. In most cells, the nucleus contains all of the cell's chromosomes except the organellar chromosomes, and is the site of RNA synthesis and processing. In some species, or in specialized cell types, RNA metabolism or DNA replication may be absent [goid 5634] [evidence ISS]; A membrane-bounded organelle …	The aggregation, arrangement and bonding together of a nucleosome, the beadlike structural units of eukaryotic chromatin composed of histones and DNA [goid 6334] [evidence IEA]; The synthesis of either RNA on a template of DNA or DNA on a template of RNA [goid 6350] [evidence IEA]; Any process that modulates the frequency, rate or extent of DNA-dependent transcription [goid 6355] [evidence IEA]; …	Interacting selectively with DNA sequences encoding ribosomal RNA [goid 182] [pmid 11395479] [evidence NAS]; Interacting selectively with any protein or protein complex (a complex of two or more proteins that may include other nonprotein molecules) [goid 5515] [pmid 11395479] [evidence NAS]
LOC652259	PREDICTED: Homo sapiens hypothetical protein LOC652259 (LOC652259), mRNA.	-1.2348	0.028197
LOC642109	PREDICTED: Homo sapiens similar to FRG1 protein (FSHD region gene 1 protein) (LOC642109), mRNA.	-1.4676	0.028678
TFR2	Homo sapiens transferrin receptor 2 (TFR2), mRNA.	-1.17	0.0291931	All of the contents of a cell excluding the plasma membrane and nucleus, but including other subcellular structures [goid 5737] [evidence IEA]; The membrane surrounding a cell that separates the cell from its external environment. It consists of a phospholipid bilayer and associated proteins [goid 5886] [evidence IEA]; Penetrating at least one phospholipid bilayer of a plasma membrane. May also r…	The hydrolysis of a peptide bond or bonds within a protein [goid 6508] [evidence IEA]; The directed movement of iron (Fe) ions into, out of, within or between cells [goid 6826] [pmid 10409623] [evidence NAS]; The regulation of the levels, transport, and metabolism of iron ions within a cell or between a cell and its external environment [goid 6879] [pmid 15319276] [evidence TAS]	Combining with an extracellular or intracellular messenger to initiate a change in cell activity [goid 4872] [evidence IEA]; Combining with transferrin to initiate a change in cell activity [goid 4998] [pmid 10409623] [evidence NAS]; Catalysis of the hydrolysis of a peptide bond. A peptide bond is a covalent bond formed when the carbon atom from the carboxyl group of one amino acid shares electro…
HSFY1	Homo sapiens heat shock transcription factor, Y-linked 1 (HSFY1), transcript variant 2, mRNA.	1.2378	0.0304006	A membrane-bounded organelle of eukaryotic cells in which chromosomes are housed and replicated. In most cells, the nucleus contains all of the cell's chromosomes except the organellar chromosomes, and is the site of RNA synthesis and processing. In some species, or in specialized cell types, RNA metabolism or DNA replication may be absent [goid 5634] [evidence IEA]; All of the contents of a cell…	The synthesis of either RNA on a template of DNA or DNA on a template of RNA [goid 6350] [evidence IEA]; Any process that modulates the frequency, rate or extent of DNA-dependent transcription [goid 6355] [evidence IEA]	The function of binding to a specific DNA sequence in order to modulate transcription. The transcription factor may or may not also interact selectively with a protein or macromolecular complex [goid 3700] [evidence IEA]; Interacting selectively with DNA of a specific nucleotide composition, e.g. GC-rich DNA binding, or with a specific sequence motif or type of DNA e.g. promotor binding or rDNA b…
HS.540976	603072960F1 NIH_MGC_119 Homo sapiens cDNA clone IMAGE:5164863 5, mRNA sequence	1.1643	0.0305255
CDCA4	Homo sapiens cell division cycle associated 4 (CDCA4), transcript variant 14, mRNA.	1.1611	0.03061	A membrane-bounded organelle of eukaryotic cells in which chromosomes are housed and replicated. In most cells, the nucleus contains all of the cell's chromosomes except the organellar chromosomes, and is the site of RNA synthesis and processing. In some species, or in specialized cell types, RNA metabolism or DNA replication may be absent [goid 5634] [evidence IEA]
CD58	Homo sapiens CD58 molecule (CD58), mRNA.	1.1748	0.0307954	The membrane surrounding a cell that separates the cell from its external environment. It consists of a phospholipid bilayer and associated proteins [goid 5886] [evidence IEA]; Penetrating at least one phospholipid bilayer of a plasma membrane. May also refer to the state of being buried in the bilayer with no exposure outside the bilayer [goid 5887] [pmid 7544493] [evidence NAS]; Tethered to a m…	The attachment of one cell to another cell via adhesion molecules [goid 16337] [pmid 7544493] [evidence NAS]	Interacting selectively with any protein or protein complex (a complex of two or more proteins that may include other nonprotein molecules) [goid 5515] [pmid 7544493] [evidence IPI]
HS.249972	Homo sapiens mRNA for KIAA1697 protein, partial cds	1.1955	0.0309866
FLJ40113	Homo sapiens golgi autoantigen, golgin subfamily a-like pseudogene (FLJ40113) on chromosome 15.	1.1553	0.0313717
LOC644150	PREDICTED: Homo sapiens similar to SH3 domain binding protein CR16, transcript variant 1 (LOC644150), mRNA.	-1.2346	0.0314142
LOC647783	PREDICTED: Homo sapiens hypothetical protein LOC647783 (LOC647783), mRNA.	-1.1919	0.0317833
LCP2	Homo sapiens lymphocyte cytosolic protein 2 (SH2 domain containing leukocyte protein of 76kDa) (LCP2), mRNA.	-1.153	0.0318627	All of the contents of a cell excluding the plasma membrane and nucleus, but including other subcellular structures [goid 5737] [evidence IEA]; That part of the cytoplasm that does not contain membranous or particulate subcellular components [goid 5829] [pmid 17652306] [evidence EXP]; That part of the cytoplasm that does not contain membranous or particulate subcellular components [goid 5829] [pm…	Any immune system process that functions in the calibrated response of an organism to a potential internal or invasive threat [goid 6955] [pmid 7706237] [evidence TAS]; The series of molecular signals generated as a consequence of a transmembrane receptor tyrosine kinase binding to its physiological ligand [goid 7169] [pmid 7706237] [evidence TAS]; The change in morphology and behavior of a mast …	Interacting selectively with any protein or protein complex (a complex of two or more proteins that may include other nonprotein molecules) [goid 5515] [pmid 12029088] [evidence IPI]
EIF4EBP3	Homo sapiens eukaryotic translation initiation factor 4E binding protein 3 (EIF4EBP3), mRNA.	-1.1928	0.0321503	The eukaryotic translation initiation factor 4F complex is composed of eIF4E, eIF4A and eIF4G; it is involved in the recognition of the mRNA cap, ATP-dependent unwinding of the 5'-terminal secondary structure and recruitment of the mRNA to the ribosome [goid 16281] [pmid 9593750] [evidence NAS]	Any process that stops, prevents or reduces the frequency, rate or extent of translational initiation [goid 45947] [pmid 9593750] [evidence NAS]	Interacting selectively with any protein or protein complex (a complex of two or more proteins that may include other nonprotein molecules) [goid 5515] [pmid 15153109] [evidence IPI]; Interacting selectively with eukaryotic initiation factor 4E, a polypeptide factor involved in the initiation of ribosome-mediated translation [goid 8190] [evidence IEA]; Antagonizes ribosome-mediated translation of…
SUGT1	Homo sapiens SGT1, suppressor of G2 allele of SKP1 (S. cerevisiae) (SUGT1), mRNA.	1.1591	0.0322757	A protein complex that includes a ubiquitin-protein ligase (E3) and other proteins that may confer substrate specificity on the complex [goid 151] [pmid 10445024] [evidence TAS]; A multisubunit complex that is located at the centromeric region of DNA and provides an attachment point for the spindle microtubules [goid 776] [pmid 10445024] [evidence TAS]	The chemical reactions and pathways resulting in the breakdown of a protein or peptide by hydrolysis of its peptide bonds, initiated by the covalent attachment of a ubiquitin moiety, or multiple ubiquitin moieties, to the protein [goid 6511] [evidence IEA]; Progression through mitosis, the division of the eukaryotic cell nucleus to produce two daughter nuclei that, usually, contain the identical …	The selective, often stoichiometric, interaction of a molecule with one or more specific sites on another molecule [goid 5488] [evidence IEA]
CLCN3	Homo sapiens chloride channel 3 (CLCN3), transcript variant e, mRNA.	1.1763	0.0326996	The lipid bilayer surrounding any of the compartments of the Golgi apparatus [goid 139] [evidence IEA]; A compound membranous cytoplasmic organelle of eukaryotic cells, consisting of flattened, ribosome-free vesicles arranged in a more or less regular stack. The Golgi apparatus differs from the endoplasmic reticulum in often having slightly thicker membranes, appearing in sections as a characteri…	The directed movement of charged atoms or small charged molecules into, out of, within or between cells [goid 6811] [evidence IEA]; The directed movement of chloride into, out of, within or between cells [goid 6821] [evidence IEA]; Any process that modulates the internal pH of an organism, part of an organism or a cell, measured by the concentration of the hydrogen ion [goid 6885] [pmid 12471024]…	Catalysis of the transmembrane transfer of an ion by a voltage-gated channel. An ion is an atom or group of atoms carrying an electric charge by virtue of having gained or lost one or more electrons [goid 5244] [evidence IEA]; Catalysis of the transmembrane transfer of a chloride ion by a voltage-gated channel [goid 5247] [pmid 7665160] [evidence TAS]; Interacting selectively with any protein or …
AMY2B	Homo sapiens amylase, alpha 2B (pancreatic) (AMY2B), mRNA.	-1.2312	0.0327214	The space external to the outermost structure of a cell. For cells without external protective or external encapsulating structures this refers to space outside of the plasma membrane. This term covers the host cell environment outside an intracellular parasite [goid 5576] [evidence IEA]	The chemical reactions and pathways involving carbohydrates, any of a group of organic compounds based of the general formula Cx(H2O)y. Includes the formation of carbohydrate derivatives by the addition of a carbohydrate residue to another molecule [goid 5975] [pmid 2401405] [evidence NAS]; The whole of the physical, chemical, and biochemical processes carried out by multicellular organisms to br…	Catalysis of the endohydrolysis of 1,4-alpha-D-glucosidic linkages in polysaccharides containing three or more 1,4-alpha-linked D-glucose units [goid 4556] [pmid 2401405] [evidence TAS]; Interacting selectively with calcium ions (Ca2+) [goid 5509] [evidence IEA]; Catalysis of the hydrolysis of any glycosyl bond [goid 16798] [evidence IEA]; Interacting selectively with chloride ions (Cl-) [goid 31…
LOC654103	PREDICTED: Homo sapiens similar to solute carrier family 25, member 37 (LOC654103), mRNA.	1.1656	0.0327699
ZMAT1	Homo sapiens zinc finger, matrin type 1 (ZMAT1), transcript variant 3, mRNA.	1.1697	0.0327858	The living contents of a cell; the matter contained within (but not including) the plasma membrane, usually taken to exclude large vacuoles and masses of secretory or ingested material. In eukaryotes it includes the nucleus and cytoplasm [goid 5622] [evidence IEA]; The living contents of a cell; the matter contained within (but not including) the plasma membrane, usually taken to exclude large va…		Interacting selectively with any nucleic acid [goid 3676] [evidence IEA]; Interacting selectively with zinc (Zn) ions [goid 8270] [evidence IEA]; Interacting selectively with DNA (deoxyribonucleic acid) [goid 3677] [evidence IEA]; Interacting selectively with zinc (Zn) ions [goid 8270] [evidence IEA]; Interacting selectively with any metal ion [goid 46872] [evidence IEA]
GPR175	Homo sapiens G protein-coupled receptor 175 (GPR175), mRNA.	-1.155	0.0328525	Double layer of lipid molecules that encloses all cells, and, in eukaryotes, many organelles; may be a single or double lipid bilayer; also includes associated proteins [goid 16020] [evidence IEA]; Penetrating at least one phospholipid bilayer of a membrane. May also refer to the state of being buried in the bilayer with no exposure outside the bilayer. When used to describe a protein, indicates …	The chemical reactions and pathways involving lipids, compounds soluble in an organic solvent but not, or sparingly, in an aqueous solvent. Includes fatty acids; neutral fats, other fatty-acid esters, and soaps; long-chain (fatty) alcohols and waxes; sphingoids and other long-chain bases; glycolipids, phospholipids and sphingolipids; and carotenes, polyprenols, sterols, terpenes and other isopren…	A receptor that binds an extracellular ligand and transmits the signal to a heterotrimeric G-protein complex. These receptors are characteristically seven-transmembrane receptors and are made up of hetero- or homodimers [goid 4930] [pmid 10342878] [evidence TAS]
COG4	Homo sapiens component of oligomeric golgi complex 4 (COG4), mRNA.	-1.1851	0.032911	The lipid bilayer surrounding any of the compartments of the Golgi apparatus [goid 139] [evidence IEA]; A compound membranous cytoplasmic organelle of eukaryotic cells, consisting of flattened, ribosome-free vesicles arranged in a more or less regular stack. The Golgi apparatus differs from the endoplasmic reticulum in often having slightly thicker membranes, appearing in sections as a characteri…	The directed movement of proteins into, out of, within or between cells [goid 15031] [evidence IEA]	Interacting selectively with any protein or protein complex (a complex of two or more proteins that may include other nonprotein molecules) [goid 5515] [pmid 15047703] [evidence IPI]
HS.537432	UI-E-EO1-aib-b-13-0-UI.s1 UI-E-EO1 Homo sapiens cDNA clone UI-E-EO1-aib-b-13-0-UI 3, mRNA sequence	1.1472	0.0329487
LOC643081	PREDICTED: Homo sapiens hypothetical LOC643081 (LOC643081), mRNA.	1.1968	0.0334457
DNM2	Homo sapiens dynamin 2 (DNM2), transcript variant 2, mRNA.	-1.1541	0.0335015	All of the contents of a cell excluding the plasma membrane and nucleus, but including other subcellular structures [goid 5737] [evidence NAS]; Any of the various filamentous elements that form the internal framework of cells, and typically remain after treatment of the cells with mild detergent to remove membrane constituents and soluble components of the cytoplasm. The term embraces intermediat…	Progression from G2 phase to M phase of the mitotic cell cycle [goid 86] [pmid 7590285] [evidence NAS]; A type of vesicle-mediated transport in which cells take up external materials or membrane constituents by the invagination of small region of the plasma membrane to form a new membrane-bounded vesicle [goid 6897] [pmid 10101292] [evidence NAS]; A type of vesicle-mediated transport in which cel…	Interacting selectively with a nucleotide, any compound consisting of a nucleoside that is esterified with (ortho)phosphate or an oligophosphate at any hydroxyl group on the ribose or deoxyribose moiety [goid 166] [evidence IEA]; Catalysis of movement along a polymeric molecule such as a microfilament or microtubule, coupled to the hydrolysis of a nucleoside triphosphate [goid 3774] [evidence IEA…
HS.571125	603028630F1 NIH_MGC_114 Homo sapiens cDNA clone IMAGE:5199103 5, mRNA sequence	-1.185	0.0336437
MIA3	PREDICTED: Homo sapiens melanoma inhibitory activity family, member 3, transcript variant 3 (MIA3), mRNA.	-1.1745	0.0337213	Double layer of lipid molecules that encloses all cells, and, in eukaryotes, many organelles; may be a single or double lipid bilayer; also includes associated proteins [goid 16020] [evidence IEA]; Penetrating at least one phospholipid bilayer of a membrane. May also refer to the state of being buried in the bilayer with no exposure outside the bilayer. When used to describe a protein, indicates …	Any process that activates or increases the frequency, rate, or extent of leukocyte migration [goid 2687] [pmid 17726152] [evidence IDA]; Any process that stops, prevents or reduces the frequency, rate or extent of cell adhesion [goid 7162] [pmid 17726152] [evidence IDA]; Any process that stops, prevents or reduces the frequency, rate or extent of cell migration [goid 30336] [pmid 17044017] [evid…	Interacting selectively with any protein or protein complex (a complex of two or more proteins that may include other nonprotein molecules) [goid 5515] [pmid 17726152] [evidence IPI]
CT47A1	Homo sapiens cancer/testis antigen family 47, member A1 (CT47A1), mRNA.	-1.146	0.0342583
OR4L1	Homo sapiens olfactory receptor, family 4, subfamily L, member 1 (OR4L1), mRNA.	1.1498	0.0346356	The membrane surrounding a cell that separates the cell from its external environment. It consists of a phospholipid bilayer and associated proteins [goid 5886] [evidence IEA]; Penetrating at least one phospholipid bilayer of a membrane. May also refer to the state of being buried in the bilayer with no exposure outside the bilayer. When used to describe a protein, indicates that all or part of t…	The cascade of processes by which a signal interacts with a receptor, causing a change in the level or activity of a second messenger or other downstream target, and ultimately effecting a change in the functioning of the cell [goid 7165] [evidence IEA]; The series of molecular signals generated as a consequence of a G-protein coupled receptor binding to its physiological ligand [goid 7186] [evid…	Combining with an extracellular or intracellular messenger to initiate a change in cell activity [goid 4872] [evidence IEA]; Combining with airborne compounds to initiate a change in cell activity. These receptors are used for the sense of smell [goid 4984] [evidence IEA]
HS.562888	UI-1-BB1p-avd-b-02-0-UI.s1 NCI_CGAP_Pl6 Homo sapiens cDNA clone UI-1-BB1p-avd-b-02-0-UI 3, mRNA sequence	1.1321	0.0349843
HS.575417	7j82c08.x1 Soares_NSF_F8_9W_OT_PA_P_S1 Homo sapiens cDNA clone IMAGE:3392942 3, mRNA sequence	1.184	0.0353065
HS.582765	DB304592 BRAWH3 Homo sapiens cDNA clone BRAWH3003753 3, mRNA sequence	1.2351	0.0356813
FLJ10120	PREDICTED: Homo sapiens hypothetical protein FLJ10120 (FLJ10120), misc RNA.	-1.1933	0.0361667
KCMF1	Homo sapiens potassium channel modulatory factor 1 (KCMF1), mRNA.	-1.1924	0.0361736	The living contents of a cell; the matter contained within (but not including) the plasma membrane, usually taken to exclude large vacuoles and masses of secretory or ingested material. In eukaryotes it includes the nucleus and cytoplasm [goid 5622] [evidence IEA]	The chemical reactions and pathways resulting in the breakdown of a protein or peptide by hydrolysis of its peptide bonds, initiated by the covalent attachment of a ubiquitin moiety, or multiple ubiquitin moieties, to the protein [goid 6511] [evidence IEA]	Interacting selectively with zinc (Zn) ions [goid 8270] [evidence IEA]; Catalysis of the ligation of two substances with concomitant breaking of a diphosphate linkage, usually in a nucleoside triphosphate. Ligase is the systematic name for any enzyme of EC class 6 [goid 16874] [evidence IEA]; Interacting selectively with any metal ion [goid 46872] [evidence IEA]
LOC728734	PREDICTED: Homo sapiens similar to kidney-specific protein (KS), transcript variant 1 (LOC728734), mRNA.	1.2492	0.0364997
LOC653857	PREDICTED: Homo sapiens similar to actin-related protein 3-beta, transcript variant 2 (LOC653857), mRNA.	-1.1501	0.0366923
BIVM	Homo sapiens basic, immunoglobulin-like variable motif containing (BIVM), mRNA.	-1.1866	0.036914	A membrane-bounded organelle of eukaryotic cells in which chromosomes are housed and replicated. In most cells, the nucleus contains all of the cell's chromosomes except the organellar chromosomes, and is the site of RNA synthesis and processing. In some species, or in specialized cell types, RNA metabolism or DNA replication may be absent [goid 5634] [evidence IEA]; All of the contents of a cell…
LOC440731	PREDICTED: Homo sapiens hypothetical LOC440731, transcript variant 2 (LOC440731), mRNA.	-1.1876	0.0371965
ERCC6	Homo sapiens excision repair cross-complementing rodent repair deficiency, complementation group 6 (ERCC6), mRNA.	-1.1398	0.0374397	That fraction of cells, prepared by disruptive biochemical methods, that is soluble in water [goid 5625] [pmid 16916636] [evidence IDA]; A membrane-bounded organelle of eukaryotic cells in which chromosomes are housed and replicated. In most cells, the nucleus contains all of the cell's chromosomes except the organellar chromosomes, and is the site of RNA synthesis and processing. In some species…	A change in state or activity of a cell or an organism (in terms of movement, secretion, enzyme production, gene expression, etc.) as a result of a superoxide stimulus. Superoxide is the anion, oxygen-, formed by addition of one electron to dioxygen (O2) or any compound containing the superoxide anion [goid 303] [evidence IEA]; The preferential repair of DNA lesions on the actively transcribed st…	Interacting selectively with a nucleotide, any compound consisting of a nucleoside that is esterified with (ortho)phosphate or an oligophosphate at any hydroxyl group on the ribose or deoxyribose moiety [goid 166] [evidence IEA]; Interacting selectively with DNA (deoxyribonucleic acid) [goid 3677] [pmid 16107709] [evidence IDA]; Interacting selectively with DNA (deoxyribonucleic acid) [goid 3677]…
PCDH18	Homo sapiens protocadherin 18 (PCDH18), mRNA.	1.1682	0.0375358	The membrane surrounding a cell that separates the cell from its external environment. It consists of a phospholipid bilayer and associated proteins [goid 5886] [evidence IEA]; Penetrating at least one phospholipid bilayer of a membrane. May also refer to the state of being buried in the bilayer with no exposure outside the bilayer. When used to describe a protein, indicates that all or part of t…	The attachment of a cell, either to another cell or to an underlying substrate such as the extracellular matrix, via cell adhesion molecules [goid 7155] [evidence IEA]; The attachment of an adhesion molecule in one cell to an identical molecule in an adjacent cell [goid 7156] [evidence IEA]; The process whose specific outcome is the progression of the brain over time, from its formation to the ma…	Interacting selectively with calcium ions (Ca2+) [goid 5509] [evidence IEA]; Interacting selectively with any protein or protein complex (a complex of two or more proteins that may include other nonprotein molecules) [goid 5515] [evidence ISS]
LOC644634	PREDICTED: Homo sapiens hypothetical protein LOC644634 (LOC644634), mRNA.	1.2072	0.0379389
SGMS2	Homo sapiens sphingomyelin synthase 2 (SGMS2), mRNA.	-1.1679	0.0382692	The lipid bilayer surrounding any of the compartments of the Golgi apparatus [goid 139] [evidence IEA]; A compound membranous cytoplasmic organelle of eukaryotic cells, consisting of flattened, ribosome-free vesicles arranged in a more or less regular stack. The Golgi apparatus differs from the endoplasmic reticulum in often having slightly thicker membranes, appearing in sections as a characteri…	The chemical reactions and pathways involving lipids, compounds soluble in an organic solvent but not, or sparingly, in an aqueous solvent. Includes fatty acids; neutral fats, other fatty-acid esters, and soaps; long-chain (fatty) alcohols and waxes; sphingoids and other long-chain bases; glycolipids, phospholipids and sphingolipids; and carotenes, polyprenols, sterols, terpenes and other isopren…	Catalysis of the transfer of a phosphate group, usually from ATP, to a substrate molecule [goid 16301] [evidence IEA]; Catalysis of the transfer of a group, e.g. a methyl group, glycosyl group, acyl group, phosphorus-containing, or other groups, from one compound (generally regarded as the donor) to another compound (generally regarded as the acceptor). Transferase is the systematic name for any …
ZKSCAN5	Homo sapiens zinc finger with KRAB and SCAN domains 5 (ZKSCAN5), transcript variant 2, mRNA.	1.1557	0.0384049	The living contents of a cell; the matter contained within (but not including) the plasma membrane, usually taken to exclude large vacuoles and masses of secretory or ingested material. In eukaryotes it includes the nucleus and cytoplasm [goid 5622] [evidence IEA]; A membrane-bounded organelle of eukaryotic cells in which chromosomes are housed and replicated. In most cells, the nucleus contains …	The synthesis of either RNA on a template of DNA or DNA on a template of RNA [goid 6350] [evidence IEA]; Any process that modulates the frequency, rate or extent of DNA-dependent transcription [goid 6355] [pmid 10585779] [evidence NAS]	The function of binding to a specific DNA sequence in order to modulate transcription. The transcription factor may or may not also interact selectively with a protein or macromolecular complex [goid 3700] [pmid 10585779] [evidence NAS]; Interacting selectively with zinc (Zn) ions [goid 8270] [pmid 10585779] [evidence NAS]; Interacting selectively with any metal ion [goid 46872] [evidence IEA]
PAICS	Homo sapiens phosphoribosylaminoimidazole carboxylase, phosphoribosylaminoimidazole succinocarboxamide synthetase (PAICS), transcript variant 2, mRNA.	1.2053	0.0384203	A protein complex that possesses phosphoribosylaminoimidazole carboxylase activity [goid 9320] [evidence IEA]	The chemical reactions and pathways resulting in the formation of a purine nucleotide, a compound consisting of nucleoside (a purine base linked to a deoxyribose or ribose sugar) esterified with a phosphate moiety at either the 3' or 5'-hydroxyl group of its glycose moiety [goid 6164] [evidence IEA]; The chemical reactions and pathways resulting in the formation of IMP, inosine monophosphate, by …	Catalysis of the reaction: 5-amino-1-(5-phospho-D-ribosyl)imidazole-4-carboxylate = 5-amino-1-(5-phospho-D-ribosyl)imidazole + CO2 [goid 4638] [evidence IEA]; Catalysis of the reaction: ATP + 5-amino-1-(5-phospho-D-ribosyl)imidazole-4-carboxylate + L-aspartate = ADP + phosphate + (S)-2-(5-amino-1-(5-phospho-D-ribosyl)imidazole-4-carboxamido)succinate [goid 4639] [pmid 2253271] [evidence TAS]; Int…
EFHA2	Homo sapiens EF-hand domain family, member A2 (EFHA2), mRNA.	1.16	0.0385033	Double layer of lipid molecules that encloses all cells, and, in eukaryotes, many organelles; may be a single or double lipid bilayer; also includes associated proteins [goid 16020] [evidence IEA]; Penetrating at least one phospholipid bilayer of a membrane. May also refer to the state of being buried in the bilayer with no exposure outside the bilayer. When used to describe a protein, indicates …		Interacting selectively with calcium ions (Ca2+) [goid 5509] [evidence IEA]
FRYL	Homo sapiens FRY-like (FRYL), mRNA.	1.171	0.0387232		The synthesis of either RNA on a template of DNA or DNA on a template of RNA [goid 6350] [evidence IEA]; Any process that modulates the frequency, rate or extent of DNA-dependent transcription [goid 6355] [evidence IEA]	The selective, often stoichiometric, interaction of a molecule with one or more specific sites on another molecule [goid 5488] [evidence IEA]; Interacting selectively with any protein or protein complex (a complex of two or more proteins that may include other nonprotein molecules) [goid 5515] [evidence IEA]
ZNF613	Homo sapiens zinc finger protein 613 (ZNF613), transcript variant 2, mRNA.	-1.2001	0.0390966	The living contents of a cell; the matter contained within (but not including) the plasma membrane, usually taken to exclude large vacuoles and masses of secretory or ingested material. In eukaryotes it includes the nucleus and cytoplasm [goid 5622] [evidence IEA]; A membrane-bounded organelle of eukaryotic cells in which chromosomes are housed and replicated. In most cells, the nucleus contains …	The synthesis of either RNA on a template of DNA or DNA on a template of RNA [goid 6350] [evidence IEA]; Any process that modulates the frequency, rate or extent of DNA-dependent transcription [goid 6355] [evidence IEA]	Interacting selectively with DNA (deoxyribonucleic acid) [goid 3677] [evidence IEA]; Interacting selectively with zinc (Zn) ions [goid 8270] [evidence IEA]; Interacting selectively with any metal ion [goid 46872] [evidence IEA]
NUDT6	Homo sapiens nudix (nucleoside diphosphate linked moiety X)-type motif 6 (NUDT6), transcript variant 1, mRNA.	1.1875	0.039308	The part of a cell or its extracellular environment in which a gene product is located. A gene product may be located in one or more parts of a cell and its location may be as specific as a particular macromolecular complex, that is, a stable, persistent association of macromolecules that function together [goid 5575] [evidence ND ]	Any process specifically pertinent to the functioning of integrated living units: cells, tissues, organs, and organisms. A process is a collection of molecular events with a defined beginning and end [goid 8150] [evidence ND ]	The function that stimulates a cell to grow or proliferate. Most growth factors have other actions besides the induction of cell growth or proliferation [goid 8083] [pmid 7984147] [evidence TAS]; Catalysis of the hydrolysis of various bonds, e.g. C-O, C-N, C-C, phosphoric anhydride bonds, etc. Hydrolase is the systematic name for any enzyme of EC class 3 [goid 16787] [evidence IEA]
LOC643918	PREDICTED: Homo sapiens hypothetical protein LOC643917, transcript variant 3 (LOC643918), mRNA.	1.1688	0.039424
LOC653581	PREDICTED: Homo sapiens similar to TANK-binding kinase 1 (LOC653581), mRNA.	-1.1572	0.0394689
LOC653337	PREDICTED: Homo sapiens hypothetical protein LOC653336, transcript variant 2 (LOC653337), mRNA.	-1.1817	0.0394755
L3MBTL4	Homo sapiens l(3)mbt-like 4 (Drosophila) (L3MBTL4), mRNA.	-1.2339	0.0394909	A membrane-bounded organelle of eukaryotic cells in which chromosomes are housed and replicated. In most cells, the nucleus contains all of the cell's chromosomes except the organellar chromosomes, and is the site of RNA synthesis and processing. In some species, or in specialized cell types, RNA metabolism or DNA replication may be absent [goid 5634] [evidence IEA]; A membrane-bounded organelle …	Any process that modulates the frequency, rate or extent of DNA-dependent transcription [goid 6355] [evidence IEA]; Any process that modulates the frequency, rate or extent of DNA-dependent transcription [goid 6355] [evidence IEA]; Any process that modulates the frequency, rate or extent of DNA-dependent transcription [goid 6355] [evidence IEA]	The function of binding to a specific DNA sequence in order to modulate transcription. The transcription factor may or may not also interact selectively with a protein or macromolecular complex [goid 3700] [evidence IEA]; Interacting selectively with zinc (Zn) ions [goid 8270] [evidence IEA]; The function of binding to a specific DNA sequence in order to modulate transcription. The transcription …
NEK10	Homo sapiens NIMA (never in mitosis gene a)- related kinase 10 (NEK10), transcript variant 1, mRNA.	1.246	0.039662		The process of introducing a phosphate group on to a protein [goid 6468] [evidence IEA]; The process of introducing a phosphate group on to a protein [goid 6468] [evidence IEA]; The process of introducing a phosphate group on to a protein [goid 6468] [evidence IEA]; The process of introducing a phosphate group on to a protein [goid 6468] [evidence IEA]	Interacting selectively with a nucleotide, any compound consisting of a nucleoside that is esterified with (ortho)phosphate or an oligophosphate at any hydroxyl group on the ribose or deoxyribose moiety [goid 166] [evidence IEA]; Interacting selectively with magnesium (Mg) ions [goid 287] [evidence IEA]; Catalysis of the reaction: ATP + a protein serine/threonine = ADP + protein serine/threonine …
LOC400986	PREDICTED: Homo sapiens protein immuno-reactive with anti-PTH polyclonal antibodies (LOC400986), mRNA.	-1.1673	0.0397595
LOC647135	PREDICTED: Homo sapiens similar to SLIT-ROBO Rho GTPase-activating protein 2 (srGAP2) (Formin-binding protein 2), transcript variant 1 (LOC647135), mRNA.	-1.1491	0.039773
RPLP2	Homo sapiens ribosomal protein, large, P2 (RPLP2), mRNA.	1.6646	0.0406168	The living contents of a cell; the matter contained within (but not including) the plasma membrane, usually taken to exclude large vacuoles and masses of secretory or ingested material. In eukaryotes it includes the nucleus and cytoplasm [goid 5622] [evidence IEA]; That part of the cytoplasm that does not contain membranous or particulate subcellular components [goid 5829] [pmid 14567916] [eviden…	The successive addition of amino acid residues to a nascent polypeptide chain during protein biosynthesis [goid 6414] [evidence IEA]; The successive addition of amino acid residues to a nascent polypeptide chain during protein biosynthesis [goid 6414] [pmid 15189156] [evidence EXP]	Interacting selectively with an RNA molecule or a portion thereof [goid 3723] [pmid 3323886] [evidence TAS]; The action of a molecule that contributes to the structural integrity of the ribosome [goid 3735] [pmid 3323886] [evidence TAS]
LOC285929	PREDICTED: Homo sapiens similar to matrilin 2 precursor, transcript variant 1 (LOC285929), mRNA.	-1.1547	0.0411646
GCM2	Homo sapiens glial cells missing homolog 2 (Drosophila) (GCM2), mRNA.	1.2357	0.0411779	A membrane-bounded organelle of eukaryotic cells in which chromosomes are housed and replicated. In most cells, the nucleus contains all of the cell's chromosomes except the organellar chromosomes, and is the site of RNA synthesis and processing. In some species, or in specialized cell types, RNA metabolism or DNA replication may be absent [goid 5634] [pmid 9928992] [evidence NAS]	The synthesis of either RNA on a template of DNA or DNA on a template of RNA [goid 6350] [evidence IEA]; Any process that modulates the frequency, rate or extent of DNA-dependent transcription [goid 6355] [evidence IEA]; The regulation of the levels, transport, and metabolism of calcium ions within a cell or between a cell and its external environment [goid 6874] [pmid 15728199] [evidence IMP]; T…	Interacting selectively with zinc (Zn) ions [goid 8270] [evidence IEA]; Interacting selectively with DNA of a specific nucleotide composition, e.g. GC-rich DNA binding, or with a specific sequence motif or type of DNA e.g. promotor binding or rDNA binding [goid 43565] [pmid 15863676] [evidence IDA]; Interacting selectively with any metal ion [goid 46872] [evidence IEA]
HS.527241	UI-E-EJ1-ajb-c-08-0-UI.r1 UI-E-EJ1 Homo sapiens cDNA clone UI-E-EJ1-ajb-c-08-0-UI 5, mRNA sequence	-1.2123	0.0413705
SLC22A7	Homo sapiens solute carrier family 22 (organic anion transporter), member 7 (SLC22A7), transcript variant 2, mRNA.	-1.1665	0.0415186	That fraction of cells, prepared by disruptive biochemical methods, that includes the plasma and other membranes [goid 5624] [pmid 9650585] [evidence TAS]; The membrane surrounding a cell that separates the cell from its external environment. It consists of a phospholipid bilayer and associated proteins [goid 5886] [evidence IEA]; Penetrating at least one phospholipid bilayer of a plasma membrane…	The directed movement of charged atoms or small charged molecules into, out of, within or between cells [goid 6811] [evidence IEA]; The directed movement of organic anions into, out of, within or between cells. Organic anions are atoms or small molecules with a negative charge which contain carbon in covalent linkage [goid 15711] [pmid 9650585] [evidence TAS]; The directed movement of substances …	Enables the directed movement of substances (such as macromolecules, small molecules, ions) into, out of, within or between cells [goid 5215] [evidence IEA]; Catalysis of the transfer of organic anions from one side of a membrane to the other. Organic anions are atoms or small molecules with a negative charge which contain carbon in covalent linkage [goid 8514] [evidence IEA]; Catalysis of the tr…
KLB	Homo sapiens klotho beta (KLB), mRNA.	1.1898	0.0420386	Double layer of lipid molecules that encloses all cells, and, in eukaryotes, many organelles; may be a single or double lipid bilayer; also includes associated proteins [goid 16020] [evidence IEA]; Penetrating at least one phospholipid bilayer of a membrane. May also refer to the state of being buried in the bilayer with no exposure outside the bilayer. When used to describe a protein, indicates …	The chemical reactions and pathways involving carbohydrates, any of a group of organic compounds based of the general formula Cx(H2O)y. Includes the formation of carbohydrate derivatives by the addition of a carbohydrate residue to another molecule [goid 5975] [evidence IEA]	Catalysis of a biochemical reaction at physiological temperatures. In biologically catalyzed reactions, the reactants are known as substrates, and the catalysts are naturally occurring macromolecular substances known as enzymes. Enzymes possess specific binding sites for substrates, and are usually composed wholly or largely of protein, but RNA that has catalytic activity (ribozyme) is often also…
LOC441662	PREDICTED: Homo sapiens similar to CXXC finger 6 (LOC441662), mRNA.	1.1454	0.042068
PEG10	PREDICTED: Homo sapiens paternally expressed 10 (PEG10), mRNA.	-1.2017	0.042479	A membrane-bounded organelle of eukaryotic cells in which chromosomes are housed and replicated. In most cells, the nucleus contains all of the cell's chromosomes except the organellar chromosomes, and is the site of RNA synthesis and processing. In some species, or in specialized cell types, RNA metabolism or DNA replication may be absent [goid 5634] [evidence IEA]; All of the contents of a cell…	The hydrolysis of a peptide bond or bonds within a protein [goid 6508] [evidence IEA]; A form of programmed cell death induced by external or internal signals that trigger the activity of proteolytic caspases, whose actions dismantle the cell and result in cell death. Apoptosis begins internally with condensation and subsequent fragmentation of the cell nucleus (blebbing) while the plasma membran…	Interacting selectively with DNA (deoxyribonucleic acid) [goid 3677] [evidence IEA]; Catalysis of the hydrolysis of internal, alpha-peptide bonds in a polypeptide chain by a mechanism in which a water molecule bound by the side chains of aspartic residues at the active center acts as a nucleophile [goid 4190] [evidence IEA]; Interacting selectively with zinc (Zn) ions [goid 8270] [evidence IEA]; …
LDOC1L	Homo sapiens leucine zipper, down-regulated in cancer 1-like (LDOC1L), mRNA.	-1.1431	0.0426926	A membrane-bounded organelle of eukaryotic cells in which chromosomes are housed and replicated. In most cells, the nucleus contains all of the cell's chromosomes except the organellar chromosomes, and is the site of RNA synthesis and processing. In some species, or in specialized cell types, RNA metabolism or DNA replication may be absent [goid 5634] [pmid 18029348] [evidence IDA]; All of the co…
ZNF136	PREDICTED: Homo sapiens zinc finger protein 136 (ZNF136), mRNA.	1.1945	0.0433308	The living contents of a cell; the matter contained within (but not including) the plasma membrane, usually taken to exclude large vacuoles and masses of secretory or ingested material. In eukaryotes it includes the nucleus and cytoplasm [goid 5622] [evidence IEA]; The living contents of a cell; the matter contained within (but not including) the plasma membrane, usually taken to exclude large va…	Any process that modulates the frequency, rate or extent of DNA-dependent transcription [goid 6355] [evidence IEA]; Any process that stops, prevents or reduces the frequency, rate or extent of transcription from an RNA polymerase II promoter [goid 122] [pmid 7649249] [evidence TAS]; The synthesis of either RNA on a template of DNA or DNA on a template of RNA [goid 6350] [evidence IEA]; Any proces…	Interacting selectively with any nucleic acid [goid 3676] [evidence IEA]; Interacting selectively with zinc (Zn) ions [goid 8270] [evidence IEA]; Interacting selectively with any metal ion [goid 46872] [evidence IEA]; Interacting selectively with DNA (deoxyribonucleic acid) [goid 3677] [evidence IEA]; Functions to enable the transcription of specific, or specific sets, of genes by RNA polymerase …
OAT	Homo sapiens ornithine aminotransferase (gyrate atrophy) (OAT), nuclear gene encoding mitochondrial protein, mRNA.	1.17	0.0435415	A semiautonomous, self replicating organelle that occurs in varying numbers, shapes, and sizes in the cytoplasm of virtually all eukaryotic cells. It is notably the site of tissue respiration [goid 5739] [pmid 2793865] [evidence TAS]; The gel-like material, with considerable fine structure, that lies in the matrix space, or lumen, of a mitochondrion. It contains the enzymes of the tricarboxylic a…	The series of events required for an organism to receive a visual stimulus, convert it to a molecular signal, and recognize and characterize the signal. Visual stimuli are detected in the form of photons and are processed to form an image [goid 7601] [pmid 2793865] [evidence TAS]	Catalysis of the reaction: L-ornithine + a 2-oxo acid = L-glutamate 5-semialdehyde + an L-amino acid [goid 4587] [pmid 3456579] [evidence TAS]; Interacting selectively with any protein or protein complex (a complex of two or more proteins that may include other nonprotein molecules) [goid 5515] [pmid 17353931] [evidence IPI]; Catalysis of the transfer of a group, e.g. a methyl group, glycosyl gro…
EGFLAM	Homo sapiens EGF-like, fibronectin type III and laminin G domains (EGFLAM), transcript variant 4, mRNA.	1.1722	0.0436159	The space external to the outermost structure of a cell. For cells without external protective or external encapsulating structures this refers to space outside of the plasma membrane. This term covers the host cell environment outside an intracellular parasite [goid 5576] [evidence IEA]
ALS2CR14	Homo sapiens amyotrophic lateral sclerosis 2 (juvenile) chromosome region, candidate 14 (ALS2CR14), mRNA.	1.2	0.0438138
GOLGA8B	Homo sapiens golgi autoantigen, golgin subfamily a, 8B (GOLGA8B), mRNA.	1.1496	0.0439083	A compound membranous cytoplasmic organelle of eukaryotic cells, consisting of flattened, ribosome-free vesicles arranged in a more or less regular stack. The Golgi apparatus differs from the endoplasmic reticulum in often having slightly thicker membranes, appearing in sections as a characteristic shallow semicircle so that the convex side (cis or entry face) abuts the endoplasmic reticulum, sec…
SPG21	Homo sapiens spastic paraplegia 21 (autosomal recessive, Mast syndrome) (SPG21), transcript variant 1, mRNA. XM_945612 XM_945613 XM_945615 XM_945617 XM_945619 XM_945622	-1.1671	0.0439167	All of the contents of a cell excluding the plasma membrane and nucleus, but including other subcellular structures [goid 5737] [evidence IEA]; A membrane-bounded organelle that carries materials newly ingested by endocytosis. It passes many of the materials to lysosomes for degradation [goid 5768] [evidence IEA]; A compound membranous cytoplasmic organelle of eukaryotic cells, consisting of flat…	A series of molecular signals initiated by the cross-linking of an antigen receptor on a B or T cell [goid 50851] [pmid 11113139] [evidence IC ]	Interacting selectively with a CD4, a receptor found on the surface of T cells, monocytes and macrophages [goid 42609] [evidence ISS]; Interacting selectively with a CD4, a receptor found on the surface of T cells, monocytes and macrophages [goid 42609] [pmid 11113139] [evidence IPI]
LOC652837	PREDICTED: Homo sapiens similar to C-terminal binding protein 2 (LOC652837), mRNA.	-1.1392	0.0441283
ATRX	Homo sapiens alpha thalassemia/mental retardation syndrome X-linked (RAD54 homolog, S. cerevisiae) (ATRX), transcript variant 1, mRNA.	1.1928	0.0446933	A membrane-bounded organelle of eukaryotic cells in which chromosomes are housed and replicated. In most cells, the nucleus contains all of the cell's chromosomes except the organellar chromosomes, and is the site of RNA synthesis and processing. In some species, or in specialized cell types, RNA metabolism or DNA replication may be absent [goid 5634] [pmid 7874112] [evidence TAS]; A condensed fo…	The process of restoring DNA after damage. Genomes are subject to damage by chemical and physical agents in the environment (e.g. UV and ionizing radiations, chemical mutagens, fungal and bacterial toxins, etc.) and by free radicals or alkylating agents endogenously generated in metabolism. DNA is also damaged because of errors during its replication. A variety of different DNA repair pathways ha…	Interacting selectively with DNA (deoxyribonucleic acid) [goid 3677] [evidence IEA]; Interacting selectively with ATP, adenosine 5'-triphosphate, a universally important coenzyme and enzyme regulator [goid 5524] [evidence IEA]; Interacting selectively with a nucleotide, any compound consisting of a nucleoside that is esterified with (ortho)phosphate or an oligophosphate at any hydroxyl group on t…
HS.564718	tz62a11.x1 NCI_CGAP_Ov35 Homo sapiens cDNA clone IMAGE:2293148 3 similar to contains L1.t3 L1 repetitive element ;, mRNA sequence	1.1972	0.0447067
HS.564103	UI-H-FE0-bbq-g-24-0-UI.s1 NCI_CGAP_FE0 Homo sapiens cDNA clone UI-H-FE0-bbq-g-24-0-UI 3, mRNA sequence	1.1777	0.0449474
LOC51152	PREDICTED: Homo sapiens melanoma antigen (LOC51152), mRNA.	1.1448	0.045015
HS.166545	17000600003772 GRN_PREHEP Homo sapiens cDNA 5, mRNA sequence	1.1715	0.0453669
HS.564884	UI-H-CO0-ask-g-10-0-UI.s1 NCI_CGAP_Sub9 Homo sapiens cDNA clone IMAGE:5859258 3, mRNA sequence	1.1804	0.0454046
EZH2	Homo sapiens enhancer of zeste homolog 2 (Drosophila) (EZH2), transcript variant 1, mRNA.	1.2293	0.0454953	A membrane-bounded organelle of eukaryotic cells in which chromosomes are housed and replicated. In most cells, the nucleus contains all of the cell's chromosomes except the organellar chromosomes, and is the site of RNA synthesis and processing. In some species, or in specialized cell types, RNA metabolism or DNA replication may be absent [goid 5634] [evidence IEA]; A membrane-bounded organelle …	The synthesis of either RNA on a template of DNA or DNA on a template of RNA [goid 6350] [evidence IEA]; Any process that modulates the frequency, rate or extent of DNA-dependent transcription [goid 6355] [pmid 8921387] [evidence TAS]; The alteration of DNA or protein in chromatin, which may result in changing the chromatin structure [goid 16568] [evidence IEA]	Interacting selectively with DNA (deoxyribonucleic acid) [goid 3677] [evidence IEA]; Interacting selectively with DNA (deoxyribonucleic acid) [goid 3677] [pmid 8954776] [evidence TAS]; Interacting selectively with any protein or protein complex (a complex of two or more proteins that may include other nonprotein molecules) [goid 5515] [pmid 16357870] [evidence IPI]; Interacting selectively with a…
OR4K13	Homo sapiens olfactory receptor, family 4, subfamily K, member 13 (OR4K13), mRNA.	1.1481	0.0455812	The membrane surrounding a cell that separates the cell from its external environment. It consists of a phospholipid bilayer and associated proteins [goid 5886] [evidence IEA]; Penetrating at least one phospholipid bilayer of a membrane. May also refer to the state of being buried in the bilayer with no exposure outside the bilayer. When used to describe a protein, indicates that all or part of t…	The cascade of processes by which a signal interacts with a receptor, causing a change in the level or activity of a second messenger or other downstream target, and ultimately effecting a change in the functioning of the cell [goid 7165] [evidence IEA]; The series of molecular signals generated as a consequence of a G-protein coupled receptor binding to its physiological ligand [goid 7186] [evid…	Combining with an extracellular or intracellular messenger to initiate a change in cell activity [goid 4872] [evidence IEA]; Combining with airborne compounds to initiate a change in cell activity. These receptors are used for the sense of smell [goid 4984] [evidence IEA]
DNAJC28	Homo sapiens DnaJ (Hsp40) homolog, subfamily C, member 28 (DNAJC28), transcript variant 1, mRNA.	1.1403	0.0456192			Interacting selectvely with a heat shock protein, any protein synthesized or activated in response to heat shock [goid 31072] [evidence IEA]
SAMD4A	Homo sapiens sterile alpha motif domain containing 4A (SAMD4A), mRNA.	-1.1419	0.045979	Any of the discrete particles (nerve-ending particles) formed from the clublike presynaptic nerve endings that resist disruption and are snapped or torn off their attachments when brain tissue is homogenized in media isosmotic to plasma [goid 19717] [evidence IEA]	Any process that activates or increases the frequency, rate or extent of the chemical reactions and pathways resulting in the formation of proteins by the translation of mRNA [goid 45727] [pmid 16221671] [evidence IDA]	Antagonizes ribosome-mediated translation of mRNA into a polypeptide [goid 30371] [pmid 16221671] [evidence IDA]
LOC439992	PREDICTED: Homo sapiens similar to ribosomal protein S3a, transcript variant 1 (LOC439992), mRNA.	1.1466	0.0463387
LOC653636	PREDICTED: Homo sapiens similar to Hypothetical FRG1-like protein c20orf80 (LOC653636), mRNA.	-1.231	0.0463861
UBE2B	Homo sapiens ubiquitin-conjugating enzyme E2B (RAD6 homolog) (UBE2B), mRNA.	-1.1387	0.0469711	The ordered and organized complex of DNA and protein that forms the chromosome [goid 785] [evidence IEA]; A membrane-bounded organelle of eukaryotic cells in which chromosomes are housed and replicated. In most cells, the nucleus contains all of the cell's chromosomes except the organellar chromosomes, and is the site of RNA synthesis and processing. In some species, or in specialized cell types,…	Pathways for DNA repair which occur after DNA has replicated, e.g. mismatch repair, and which involve translesion synthesis (TLS-type) DNA polymerases [goid 6301] [pmid 1559696] [evidence TAS]; The chemical reactions and pathways resulting in the breakdown of a protein or peptide by hydrolysis of its peptide bonds, initiated by the covalent attachment of a ubiquitin moiety, or multiple ubiquitin …	Catalysis of the reaction: ATP + ubiquitin + protein lysine = AMP + diphosphate + protein N-ubiquityllysine [goid 4842] [evidence IEA]; Interacting selectively with any protein or protein complex (a complex of two or more proteins that may include other nonprotein molecules) [goid 5515] [evidence IEA]; Catalysis of the ligation of two substances with concomitant breaking of a diphosphate linkage,…
C2ORF56	Homo sapiens chromosome 2 open reading frame 56 (C2orf56), transcript variant 1, mRNA.	-1.2571	0.0474915	A semiautonomous, self replicating organelle that occurs in varying numbers, shapes, and sizes in the cytoplasm of virtually all eukaryotic cells. It is notably the site of tissue respiration [goid 5739] [evidence IEA]
LOC650556	PREDICTED: Homo sapiens similar to Phosphorylase b kinase gamma catalytic chain, testis/liver isoform (PHK-gamma-T) (Phosphorylase kinase gamma subunit 2) (PSK-C3) (LOC650556), mRNA.	-1.1604	0.0478271
APLP2	Homo sapiens amyloid beta (A4) precursor-like protein 2 (APLP2), mRNA.	1.1316	0.0480829	A membrane-bounded organelle of eukaryotic cells in which chromosomes are housed and replicated. In most cells, the nucleus contains all of the cell's chromosomes except the organellar chromosomes, and is the site of RNA synthesis and processing. In some species, or in specialized cell types, RNA metabolism or DNA replication may be absent [goid 5634] [pmid 7702756] [evidence IDA]; The membrane s…	Specific actions of a newborn or infant mammal that result in the derivation of nourishment from the breast [goid 1967] [evidence IEA]; The regulation of the levels, transport, and metabolism of copper ions within a cell or between a cell and its external environment [goid 6878] [evidence IEA]; Any process that modulates the frequency, rate or extent of EGF receptor activity [goid 7176] [evidence…	Interacting selectively with DNA (deoxyribonucleic acid) [goid 3677] [pmid 7702756] [evidence NAS]; Stops, prevents or reduces the activity of serine-type endopeptidases, enzymes that catalyze the hydrolysis of nonterminal peptide bonds in a polypeptide chain; a serine residue (and a histidine residue) are at the active center of the enzyme [goid 4867] [evidence IEA]; Interacting selectively with…
FOXR1	Homo sapiens forkhead box R1 (FOXR1), mRNA.	-1.3656	0.0483233	A membrane-bounded organelle of eukaryotic cells in which chromosomes are housed and replicated. In most cells, the nucleus contains all of the cell's chromosomes except the organellar chromosomes, and is the site of RNA synthesis and processing. In some species, or in specialized cell types, RNA metabolism or DNA replication may be absent [goid 5634] [evidence IEA]	The synthesis of either RNA on a template of DNA or DNA on a template of RNA [goid 6350] [evidence IEA]; Any process that modulates the frequency, rate or extent of DNA-dependent transcription [goid 6355] [evidence IEA]	The function of binding to a specific DNA sequence in order to modulate transcription. The transcription factor may or may not also interact selectively with a protein or macromolecular complex [goid 3700] [evidence IEA]; Interacting selectively with DNA of a specific nucleotide composition, e.g. GC-rich DNA binding, or with a specific sequence motif or type of DNA e.g. promotor binding or rDNA b…
HS.545589	Human small nuclear RNA U6atac, partial sequence	1.1926	0.0487044
HS.538833	AGENCOURT_14122414 NIH_MGC_187 Homo sapiens cDNA clone IMAGE:30382396 5, mRNA sequence	1.1537	0.0488822
ZMAT5	Homo sapiens zinc finger, matrin type 5 (ZMAT5), transcript variant 1, mRNA.	-1.1324	0.0490194	A membrane-bounded organelle of eukaryotic cells in which chromosomes are housed and replicated. In most cells, the nucleus contains all of the cell's chromosomes except the organellar chromosomes, and is the site of RNA synthesis and processing. In some species, or in specialized cell types, RNA metabolism or DNA replication may be absent [goid 5634] [evidence IEA]; The minor (U12-dependent) spl…	Any process involved in the conversion of a primary mRNA transcript into one or more mature mRNA(s) prior to translation into polypeptide [goid 6397] [evidence IEA]; The process of removing sections of the primary RNA transcript to remove sequences not present in the mature form of the RNA and joining the remaining sections to form the mature form of the RNA [goid 8380] [pmid 15146077] [evidence …	Interacting selectively with any nucleic acid [goid 3676] [evidence IEA]; Interacting selectively with zinc (Zn) ions [goid 8270] [evidence IEA]; Interacting selectively with any metal ion [goid 46872] [evidence IEA]
RAD51AP1	Homo sapiens RAD51 associated protein 1 (RAD51AP1), mRNA.	1.2499	0.0490649	A membrane-bounded organelle of eukaryotic cells in which chromosomes are housed and replicated. In most cells, the nucleus contains all of the cell's chromosomes except the organellar chromosomes, and is the site of RNA synthesis and processing. In some species, or in specialized cell types, RNA metabolism or DNA replication may be absent [goid 5634] [pmid 9396801] [evidence IC ]	The error-free repair of a double-strand break in DNA in which the broken DNA molecule is repaired using homologous sequences. A strand in the broken DNA searches for a homologous region in an intact chromosome to serve as the template for DNA synthesis. The restoration of two intact DNA molecules results in the exchange, reciprocal or nonreciprocal, of genetic material between the intact DNA mol…	Interacting selectively with DNA (deoxyribonucleic acid) [goid 3677] [evidence IEA]; Interacting selectively with double-stranded DNA [goid 3690] [pmid 9396801] [evidence IDA]; Interacting selectively with single-stranded DNA [goid 3697] [pmid 9396801] [evidence IDA]; Interacting selectively with an RNA molecule or a portion thereof [goid 3723] [pmid 9396801] [evidence IDA]; Interacting selective…
LOC646276	PREDICTED: Homo sapiens similar to dexamethasone-induced protein, transcript variant 2 (LOC646276), mRNA.	1.1389	0.0490969
FLJ20444	PREDICTED: Homo sapiens hypothetical protein FLJ20444, transcript variant 2 (FLJ20444), mRNA.	-1.1453	0.0498759
HBA2	Homo sapiens hemoglobin, alpha 2 (HBA2), mRNA.	-1.2056	0.0500485
CSF2RB	Homo sapiens colony stimulating factor 2 receptor, beta, low-affinity (granulocyte-macrophage) (CSF2RB), mRNA.	-1.1776	0.0503982	Double layer of lipid molecules that encloses all cells, and, in eukaryotes, many organelles; may be a single or double lipid bilayer; also includes associated proteins [goid 16020] [evidence IEA]; The heterodimeric receptor for granulocyte macrophage colony-stimulating factor [goid 30526] [pmid 9410898] [evidence TAS]	The cascade of processes by which a signal interacts with a receptor, causing a change in the level or activity of a second messenger or other downstream target, and ultimately effecting a change in the functioning of the cell [goid 7165] [pmid 1702217] [evidence NAS]; The process of gaseous exchange between an organism and its environment. In plants, microorganisms, and many small animals, air o…	Combining with an extracellular or intracellular messenger to initiate a change in cell activity [goid 4872] [evidence IEA]; Combining with an extracellular or intracellular messenger to initiate a change in cell activity [goid 4872] [pmid 9410898] [evidence TAS]; Combining with interleukin-3 to initiate a change in cell activity [goid 4912] [pmid 9410898] [evidence TAS]; Combining with interleuk…
IMPAD1	Homo sapiens inositol monophosphatase domain containing 1 (IMPAD1), mRNA.	1.1479	0.0504626	A membrane-bounded organelle of eukaryotic cells in which chromosomes are housed and replicated. In most cells, the nucleus contains all of the cell's chromosomes except the organellar chromosomes, and is the site of RNA synthesis and processing. In some species, or in specialized cell types, RNA metabolism or DNA replication may be absent [goid 5634] [pmid 18029348] [evidence IDA]; All of the co…		Interacting selectively with magnesium (Mg) ions [goid 287] [evidence IEA]; Catalysis of the reaction: myo-inositol 1-phosphate + H2O = myo-inositol + phosphate [goid 8934] [evidence IEA]; Catalysis of the hydrolysis of various bonds, e.g. C-O, C-N, C-C, phosphoric anhydride bonds, etc. Hydrolase is the systematic name for any enzyme of EC class 3 [goid 16787] [evidence IEA]
LOC646300	PREDICTED: Homo sapiens similar to alpha 3 type VI collagen isoform 1 precursor (LOC646300), mRNA.	1.1601	0.050527
BAZ2A	Homo sapiens bromodomain adjacent to zinc finger domain, 2A (BAZ2A), mRNA.	-1.1411	0.0508297	A membrane-bounded organelle of eukaryotic cells in which chromosomes are housed and replicated. In most cells, the nucleus contains all of the cell's chromosomes except the organellar chromosomes, and is the site of RNA synthesis and processing. In some species, or in specialized cell types, RNA metabolism or DNA replication may be absent [goid 5634] [evidence IEA]; A region of a chromosome wher…	Dynamic structural changes to eukaryotic chromatin occurring throughout the cell division cycle. These changes range from the local changes necessary for transcriptional regulation to global changes necessary for chromosome segregation [goid 6338] [pmid 11532953] [evidence NAS]; The synthesis of either RNA on a template of DNA or DNA on a template of RNA [goid 6350] [evidence IEA]; Any process th…	Interacting selectively with DNA (deoxyribonucleic acid) [goid 3677] [pmid 10662543] [evidence NAS]; Interacting selectively with any protein or protein complex (a complex of two or more proteins that may include other nonprotein molecules) [goid 5515] [evidence IEA]; Interacting selectively with zinc (Zn) ions [goid 8270] [evidence IEA]; Plays a role in regulating transcription; may bind a promo…
HS.552427	Homo sapiens mRNA; cDNA DKFZp686C1250 (from clone DKFZp686C1250)	-1.1408	0.0510872
GZMK	Homo sapiens granzyme K (granzyme 3; tryptase II) (GZMK), mRNA.	1.148	0.0511374	The space external to the outermost structure of a cell. For cells without external protective or external encapsulating structures this refers to space outside of the plasma membrane. This term covers the host cell environment outside an intracellular parasite [goid 5576] [evidence IEA]	The hydrolysis of a peptide bond or bonds within a protein [goid 6508] [evidence IEA]	Catalysis of the hydrolysis of internal, alpha-peptide bonds in a polypeptide chain by a catalytic mechanism that involves a catalytic triad consisting of a serine nucleophile that is activated by a proton relay involving an acidic residue (e.g. aspartate or glutamate) and a basic residue (usually histidine) [goid 4252] [evidence IEA]; Catalysis of the hydrolysis of a peptide bond. A peptide bond…
KCTD1	Homo sapiens potassium channel tetramerisation domain containing 1 (KCTD1), mRNA.	-1.1347	0.0513274	A protein complex that forms a transmembrane channel through which potassium ions may cross a cell membrane in response to changes in membrane potential [goid 8076] [evidence IEA]; Double layer of lipid molecules that encloses all cells, and, in eukaryotes, many organelles; may be a single or double lipid bilayer; also includes associated proteins [goid 16020] [evidence IEA]	The directed movement of potassium ions (K+) into, out of, within or between cells [goid 6813] [evidence IEA]	Catalysis of the transmembrane transfer of a potassium ion by a voltage-gated channel [goid 5249] [evidence IEA]; Interacting selectively with any protein or protein complex (a complex of two or more proteins that may include other nonprotein molecules) [goid 5515] [evidence IEA]
HS.543659	UI-1-BC1p-atg-g-12-0-UI.s1 NCI_CGAP_Pl3 Homo sapiens cDNA clone UI-1-BC1p-atg-g-12-0-UI 3, mRNA sequence	-1.1431	0.051452
TEK	Homo sapiens TEK tyrosine kinase, endothelial (venous malformations, multiple cutaneous and mucosal) (TEK), mRNA.	1.1171	0.0520446	Double layer of lipid molecules that encloses all cells, and, in eukaryotes, many organelles; may be a single or double lipid bilayer; also includes associated proteins [goid 16020] [evidence IEA]; Penetrating at least one phospholipid bilayer of a membrane. May also refer to the state of being buried in the bilayer with no exposure outside the bilayer. When used to describe a protein, indicates …	The process of introducing a phosphate group on to a protein [goid 6468] [evidence IEA]; The binding of a cell to the extracellular matrix via adhesion molecules [goid 7160] [evidence IEA]; The attachment of one cell to another cell via adhesion molecules [goid 16337] [evidence IEA]; Any process that modulates the frequency, rate or extent of cell migration [goid 30334] [evidence IEA]; Any proces…	Interacting selectively with a nucleotide, any compound consisting of a nucleoside that is esterified with (ortho)phosphate or an oligophosphate at any hydroxyl group on the ribose or deoxyribose moiety [goid 166] [evidence IEA]; Catalysis of the reaction: ATP + a protein tyrosine = ADP + protein tyrosine phosphate [goid 4713] [evidence IEA]; Combining with an extracellular or intracellular messe…
CCDC146	Homo sapiens coiled-coil domain containing 146 (CCDC146), mRNA.	-1.1495	0.0529668
LOC729310	PREDICTED: Homo sapiens hypothetical protein LOC729310 (LOC729310), mRNA.	-1.1977	0.053477
PRY2	Homo sapiens PTPN13-like, Y-linked 2 (PRY2), mRNA.	-1.1613	0.0535814
HS.435258	NISC_gj03b08.y1 NCI_CGAP_Pr28 Homo sapiens cDNA clone IMAGE:3270494 5, mRNA sequence	1.1985	0.0536172
EHD2	Homo sapiens EH-domain containing 2 (EHD2), mRNA.	-1.1884	0.0537003	That fraction of cells, prepared by disruptive biochemical methods, that includes the plasma and other membranes [goid 5624] [evidence IEA]; A membrane-bounded organelle of eukaryotic cells in which chromosomes are housed and replicated. In most cells, the nucleus contains all of the cell's chromosomes except the organellar chromosomes, and is the site of RNA synthesis and processing. In some spe…	A type of vesicle-mediated transport in which cells take up external materials or membrane constituents by the invagination of small region of the plasma membrane to form a new membrane-bounded vesicle [goid 6897] [evidence IEA]; A process that is carried out at the cellular level which results in the formation, arrangement of constituent parts, or disassembly of actin-based cytoskeletal structur…	Interacting selectively with a nucleotide, any compound consisting of a nucleoside that is esterified with (ortho)phosphate or an oligophosphate at any hydroxyl group on the ribose or deoxyribose moiety [goid 166] [evidence IEA]; Interacting selectively with any nucleic acid [goid 3676] [pmid 10673336] [evidence TAS]; Catalysis of the reaction: GTP + H2O = GDP + phosphate [goid 3924] [evidence IE…
LOC652213	PREDICTED: Homo sapiens hypothetical protein LOC652213 (LOC652213), mRNA.	1.147	0.0539567
LAT1-3TM	PREDICTED: Homo sapiens SLC7A5 pseudogene, transcript variant 2 (LAT1-3TM), misc RNA.	-1.2599	0.0539895
C10ORF73	PREDICTED: Homo sapiens chromosome 10 open reading frame 73 (C10orf73), mRNA.	1.1374	0.0542496
ZSWIM6	PREDICTED: Homo sapiens zinc finger, SWIM-type containing 6 (ZSWIM6), mRNA.	-1.1886	0.0545622			Interacting selectively with zinc (Zn) ions [goid 8270] [evidence IEA]; Interacting selectively with any metal ion [goid 46872] [evidence IEA]
HS.529284	Homo sapiens hypothetical protein LOC285548, mRNA (cDNA clone IMAGE:4829419)	1.1854	0.0554712
UNC93B1	Homo sapiens unc-93 homolog B1 (C. elegans) (UNC93B1), mRNA.	-1.1123	0.0555321	Double layer of lipid molecules that encloses all cells, and, in eukaryotes, many organelles; may be a single or double lipid bilayer; also includes associated proteins [goid 16020] [evidence IEA]; Penetrating at least one phospholipid bilayer of a membrane. May also refer to the state of being buried in the bilayer with no exposure outside the bilayer. When used to describe a protein, indicates …
LOC643509	PREDICTED: Homo sapiens similar to Dihydrofolate reductase, transcript variant 2 (LOC643509), mRNA.	1.2202	0.0555856
LOC731884	PREDICTED: Homo sapiens similar to programmed cell death 6 interacting protein (LOC731884), mRNA.	-1.1614	0.0556669
LOC203510	PREDICTED: Homo sapiens similar to high-mobility group box 3 (LOC203510), mRNA.	-1.247	0.0561021
LCN2	Homo sapiens lipocalin 2 (LCN2), mRNA.	1.2462	0.0561554	The space external to the outermost structure of a cell. For cells without external protective or external encapsulating structures this refers to space outside of the plasma membrane. This term covers the host cell environment outside an intracellular parasite [goid 5576] [evidence IEA]	The directed movement of substances (such as macromolecules, small molecules, ions) into, out of, within or between cells, or within a multicellular organism [goid 6810] [evidence IEA]; The directed movement of substances (such as macromolecules, small molecules, ions) into, out of, within or between cells, or within a multicellular organism [goid 6810] [evidence IEA]	Enables the directed movement of substances (such as macromolecules, small molecules, ions) into, out of, within or between cells [goid 5215] [evidence IEA]; The selective, often stoichiometric, interaction of a molecule with one or more specific sites on another molecule [goid 5488] [evidence IEA]; Enables the directed movement of substances (such as macromolecules, small molecules, ions) into, …
SNORA46	Homo sapiens small nucleolar RNA, H/ACA box 46 (SNORA46), small nucleolar RNA.	1.3103	0.0562219
PDE10A	Homo sapiens phosphodiesterase 10A (PDE10A), mRNA.	-1.19	0.0562368	All of the contents of a cell excluding the plasma membrane and nucleus, but including other subcellular structures [goid 5737] [evidence IEA]	The cascade of processes by which a signal interacts with a receptor, causing a change in the level or activity of a second messenger or other downstream target, and ultimately effecting a change in the functioning of the cell [goid 7165] [evidence IEA]	Interacting selectively with a nucleotide, any compound consisting of a nucleoside that is esterified with (ortho)phosphate or an oligophosphate at any hydroxyl group on the ribose or deoxyribose moiety [goid 166] [evidence IEA]; Catalysis of the reaction: nucleoside 3',5'-cyclic phosphate + H2O = nucleoside 5'-phosphate [goid 4114] [pmid 10373451] [evidence TAS]; Catalysis of the hydrolysis of v…
LOC653094	PREDICTED: Homo sapiens similar to transmembrane protein 29, transcript variant 3 (LOC653094), mRNA.	1.1375	0.0567156
HS.554056	CR741512 Soares_parathyroid_tumor_NbHPA Homo sapiens cDNA clone IMAGp971I1858 ; IMAGE:1240411 5, mRNA sequence	-1.14	0.0571
HS.514958	DKFZp434G2316_s1 434 (synonym: htes3) Homo sapiens cDNA clone DKFZp434G2316 3, mRNA sequence	1.1347	0.0575926
CHRM2	Homo sapiens cholinergic receptor, muscarinic 2 (CHRM2), transcript variant 1, mRNA.	1.1442	0.0577816	The membrane surrounding a cell that separates the cell from its external environment. It consists of a phospholipid bilayer and associated proteins [goid 5886] [pmid 3443095] [evidence TAS]; Penetrating at least one phospholipid bilayer of a plasma membrane. May also refer to the state of being buried in the bilayer with no exposure outside the bilayer [goid 5887] [pmid 3037705] [evidence TAS]; …	The cascade of processes by which a signal interacts with a receptor, causing a change in the level or activity of a second messenger or other downstream target, and ultimately effecting a change in the functioning of the cell [goid 7165] [evidence IEA]; The series of molecular signals generated as a consequence of a G-protein coupled receptor binding to its physiological ligand, followed by modu…	Combining with an extracellular or intracellular messenger to initiate a change in cell activity [goid 4872] [evidence IEA]; [goid 4981] [pmid 9603968] [evidence TAS]
LOC653495	PREDICTED: Homo sapiens similar to synovial sarcoma, X breakpoint 3 isoform a (LOC653495), mRNA.	1.1583	0.0583346
LOC728927	PREDICTED: Homo sapiens similar to hCG40110 (LOC728927), mRNA.	1.1747	0.0584507
NSBP1	Homo sapiens nucleosomal binding protein 1 (NSBP1), mRNA.	1.1215	0.0585849	The ordered and organized complex of DNA and protein that forms the chromosome [goid 785] [evidence IEA]; A membrane-bounded organelle of eukaryotic cells in which chromosomes are housed and replicated. In most cells, the nucleus contains all of the cell's chromosomes except the organellar chromosomes, and is the site of RNA synthesis and processing. In some species, or in specialized cell types,…	Any process that modulates the frequency, rate or extent of transcription from an RNA polymerase I promoter [goid 6356] [evidence IEA]; Any process that modulates the frequency, rate or extent of transcription from an RNA polymerase I promoter [goid 6356] [evidence IEA]; Any process that modulates the frequency, rate or extent of transcription from an RNA polymerase I promoter [goid 6356] [eviden…	Interacting selectively with DNA (deoxyribonucleic acid) [goid 3677] [evidence IEA]; Interacting selectively with DNA (deoxyribonucleic acid) [goid 3677] [evidence IEA]; Interacting selectively with chromatin, the network of fibers of DNA and protein that make up the chromosomes of the eukaryotic nucleus during interphase [goid 3682] [evidence IEA]; Interacting selectively with DNA (deoxyribonucl…
MARS2	Homo sapiens methionyl-tRNA synthetase 2, mitochondrial (MARS2), nuclear gene encoding mitochondrial protein, mRNA.	1.1073	0.0586445	All of the contents of a cell excluding the plasma membrane and nucleus, but including other subcellular structures [goid 5737] [evidence IEA]; A semiautonomous, self replicating organelle that occurs in varying numbers, shapes, and sizes in the cytoplasm of virtually all eukaryotic cells. It is notably the site of tissue respiration [goid 5739] [evidence IEA]; The gel-like material, with conside…	The process of coupling methionine to methionyl-tRNA, catalyzed by methionyl-tRNA synthetase. In tRNA aminoacylation, the amino acid is first activated by linkage to AMP and then transferred to either the 2'- or the 3'-hydroxyl group of the 3'-adenosine residue of the tRNA [goid 6431] [pmid 15274629] [evidence IDA]	Interacting selectively with a nucleotide, any compound consisting of a nucleoside that is esterified with (ortho)phosphate or an oligophosphate at any hydroxyl group on the ribose or deoxyribose moiety [goid 166] [evidence IEA]; Catalysis of the reaction: ATP + L-methionine + tRNA(Met) = AMP + diphosphate + L-methionyl-tRNA(Met) [goid 4825] [pmid 15274629] [evidence IDA]; Interacting selectively…
MYL1	Homo sapiens myosin, light chain 1, alkali; skeletal, fast (MYL1), transcript variant 1f, mRNA.	1.1565	0.0590698	A filament of myosin found in a muscle cell of any type [goid 5859] [pmid 3904738] [evidence NAS]; A protein complex, formed of one or more myosin heavy chains plus associated light chains and other proteins, that functions as a molecular motor; uses the energy of ATP hydrolysis to move actin filaments or to move vesicles or other cargo on fixed actin filaments; has magnesium-ATPase activity and …	The process whose specific outcome is the progression of the muscle over time, from its formation to the mature structure. The muscle is an organ consisting of a tissue made up of various elongated cells that are specialized to contract and thus to produce movement and mechanical work [goid 7517] [evidence NAS]; The sliding of actin thin filaments and myosin thick filaments past each other in mus…	Catalysis of movement along a polymeric molecule such as a microfilament or microtubule, coupled to the hydrolysis of a nucleoside triphosphate [goid 3774] [evidence IEA]; Interacting selectively with calcium ions (Ca2+) [goid 5509] [evidence IEA]; The action of a molecule that contributes to the structural integrity of a muscle fiber [goid 8307] [pmid 3904738] [evidence NAS]; Catalysis of moveme…
DCDC2B	Homo sapiens doublecortin domain containing 2B (DCDC2B), mRNA.	1.1892	0.05926		A series of reactions within the cell that occur as a result of a single trigger reaction or compound [goid 7242] [evidence IEA]
TTLL3	Homo sapiens tubulin tyrosine ligase-like family, member 3 (TTLL3), mRNA.	-1.1541	0.0593308		The covalent alteration of one or more amino acids occurring in proteins, peptides and nascent polypeptides (co-translational, post-translational modifications). Includes the modification of charged tRNAs that are destined to occur in a protein (pre-translation modification) [goid 6464] [evidence IEA]	Catalysis of the reaction: ATP + detyrosinated alpha-tubulin + L-tyrosine = alpha-tubulin + ADP + phosphate [goid 4835] [evidence IEA]
HS.259350	hi66h02.x1 Soares_NFL_T_GBC_S1 Homo sapiens cDNA clone IMAGE:2977299 3, mRNA sequence	1.116	0.0593737
LOC654165	PREDICTED: Homo sapiens similar to glycerophosphodiester phosphodiesterase domain containing 5 (LOC654165), mRNA.	-1.1504	0.0596291
LOC645769	PREDICTED: Homo sapiens hypothetical LOC645769 (LOC645769), misc RNA.	1.1789	0.0597019
CHMP2A	Homo sapiens chromatin modifying protein 2A (CHMP2A), transcript variant 1, mRNA.	-1.1241	0.0600072	A membrane-bounded organelle that carries materials newly ingested by endocytosis. It passes many of the materials to lysosomes for degradation [goid 5768] [evidence IEA]; Double layer of lipid molecules that encloses all cells, and, in eukaryotes, many organelles; may be a single or double lipid bilayer; also includes associated proteins [goid 16020] [evidence IEA]; The lipid bilayer surrounding…	The directed movement of proteins into, out of, within or between cells [goid 15031] [evidence IEA]	Interacting selectively with a specific domain of a protein [goid 19904] [pmid 17928862] [evidence IPI]
C11ORF73	Homo sapiens chromosome 11 open reading frame 73 (C11orf73), mRNA.	1.1419	0.060344	All of the contents of a cell excluding the plasma membrane and nucleus, but including other subcellular structures [goid 5737] [evidence IEA]	The biological process whose specific outcome is the progression of a multicellular organism over time from an initial condition (e.g. a zygote or a young adult) to a later condition (e.g. a multicellular animal or an aged adult) [goid 7275] [evidence IEA]
C20ORF165	Homo sapiens chromosome 20 open reading frame 165 (C20orf165), mRNA.	1.1568	0.0604493	Double layer of lipid molecules that encloses all cells, and, in eukaryotes, many organelles; may be a single or double lipid bilayer; also includes associated proteins [goid 16020] [evidence IEA]; Penetrating at least one phospholipid bilayer of a membrane. May also refer to the state of being buried in the bilayer with no exposure outside the bilayer. When used to describe a protein, indicates …
LHPP	Homo sapiens phospholysine phosphohistidine inorganic pyrophosphate phosphatase (LHPP), mRNA.	1.118	0.0609588	A membrane-bounded organelle of eukaryotic cells in which chromosomes are housed and replicated. In most cells, the nucleus contains all of the cell's chromosomes except the organellar chromosomes, and is the site of RNA synthesis and processing. In some species, or in specialized cell types, RNA metabolism or DNA replication may be absent [goid 5634] [pmid 18029348] [evidence IDA]; All of the co…	The chemical reactions and pathways, including anabolism and catabolism, by which living organisms transform chemical substances. Metabolic processes typically transform small molecules, but also include macromolecular processes such as DNA repair and replication, and protein synthesis and degradation [goid 8152] [evidence IEA]; The chemical reactions and pathways, including anabolism and catabol…	Catalysis of the reaction: diphosphate + H2O = 2 phosphate [goid 4427] [evidence IEA]; Catalysis of the hydrolysis of various bonds, e.g. C-O, C-N, C-C, phosphoric anhydride bonds, etc. Hydrolase is the systematic name for any enzyme of EC class 3 [goid 16787] [evidence IEA]; Catalysis of a biochemical reaction at physiological temperatures. In biologically catalyzed reactions, the reactants are …
RWDD2A	Homo sapiens RWD domain containing 2A (RWDD2A), mRNA.	1.206	0.0616136
HS.548045	602501296F1 NIH_MGC_75 Homo sapiens cDNA clone IMAGE:4615150 5, mRNA sequence	-1.13	0.0616475
TRIM5	Homo sapiens tripartite motif-containing 5 (TRIM5), transcript variant gamma, mRNA.	-1.1906	0.061871	The living contents of a cell; the matter contained within (but not including) the plasma membrane, usually taken to exclude large vacuoles and masses of secretory or ingested material. In eukaryotes it includes the nucleus and cytoplasm [goid 5622] [evidence IEA]; All of the contents of a cell excluding the plasma membrane and nucleus, but including other subcellular structures [goid 5737] [evid…	The chemical reactions and pathways resulting in the breakdown of a protein or peptide by hydrolysis of its peptide bonds, initiated by the covalent attachment of a ubiquitin moiety, or multiple ubiquitin moieties, to the protein [goid 6511] [evidence IEA]; A change in state or activity of a cell or an organism (in terms of movement, secretion, enzyme production, gene expression, etc.) as a resul…	Interacting selectively with any protein or protein complex (a complex of two or more proteins that may include other nonprotein molecules) [goid 5515] [pmid 15967037] [evidence IPI]; Interacting selectively with any protein or protein complex (a complex of two or more proteins that may include other nonprotein molecules) [goid 5515] [pmid 15919943] [evidence IPI]; Interacting selectively with an…
C17ORF60	Homo sapiens chromosome 17 open reading frame 60 (C17orf60), mRNA.	1.1283	0.0624229
SP100	Homo sapiens SP100 nuclear antigen (SP100), transcript variant 2, mRNA.	1.1911	0.0624523	The ordered and organized complex of DNA and protein that forms the chromosome [goid 785] [evidence IEA]; A membrane-bounded organelle of eukaryotic cells in which chromosomes are housed and replicated. In most cells, the nucleus contains all of the cell's chromosomes except the organellar chromosomes, and is the site of RNA synthesis and processing. In some species, or in specialized cell types,…	Any process that modulates the frequency, rate or extent of DNA-dependent transcription [goid 6355] [pmid 2258622] [evidence TAS]	Interacting selectively with DNA (deoxyribonucleic acid) [goid 3677] [evidence IEA]; Interacting selectively with a specific domain of a protein [goid 19904] [pmid 9636147] [evidence IPI]
LOC728343	PREDICTED: Homo sapiens similar to nuclear RNA export factor 2, transcript variant 2 (LOC728343), mRNA.	1.1583	0.0625013
LOC653907	PREDICTED: Homo sapiens similar to complement receptor related protein isoform 1 (LOC653907), mRNA.	1.1554	0.0625044
TRIT1	Homo sapiens tRNA isopentenyltransferase 1 (TRIT1), mRNA.	1.2699	0.0625289	The part of a cell or its extracellular environment in which a gene product is located. A gene product may be located in one or more parts of a cell and its location may be as specific as a particular macromolecular complex, that is, a stable, persistent association of macromolecules that function together [goid 5575] [evidence ND ]; All of the contents of a cell excluding the plasma membrane and…	The process by which a pre-tRNA molecule is converted to a mature tRNA, ready for addition of an aminoacyl group [goid 8033] [evidence NAS]; The process by which a pre-tRNA molecule is converted to a mature tRNA, ready for addition of an aminoacyl group [goid 8033] [evidence IEA]	Interacting selectively with a nucleotide, any compound consisting of a nucleoside that is esterified with (ortho)phosphate or an oligophosphate at any hydroxyl group on the ribose or deoxyribose moiety [goid 166] [evidence IEA]; Catalysis of the reaction: isopentenyl diphosphate + tRNA = diphosphate + tRNA containing 6-isopentenyladenosine [goid 4811] [pmid 11111046] [evidence TAS]; Interacting …
IL2RA	Homo sapiens interleukin 2 receptor, alpha (IL2RA), mRNA.	1.2097	0.062553	The side of the plasma membrane that is opposite to the side that faces the cytoplasm [goid 9897] [evidence IEA]; The membrane surrounding a cell that separates the cell from its external environment. It consists of a phospholipid bilayer and associated proteins [goid 5886] [pmid 2983318] [evidence TAS]; The membrane surrounding a cell that separates the cell from its external environment. It con…	The process of apoptosis in activated T cells [goid 6924] [evidence IEA]; Any process that activates or increases the rate or extent of activated T cell proliferation [goid 42104] [evidence IEA]; Any process that stops, prevents or reduces the rate or extent of T cell proliferation [goid 42130] [evidence IEA]; Any process that activates or increases the frequency, rate or extent of cell death by …	Combining with interleukin-2 to initiate a change in cell activity [goid 4911] [evidence IEA]; Combining with an extracellular or intracellular messenger to initiate a change in cell activity [goid 4872] [evidence IEA]; Combining with an extracellular or intracellular messenger to initiate a change in cell activity [goid 4872] [evidence IEA]; Combining with interleukin-2 to initiate a change in c…
LOC388474	PREDICTED: Homo sapiens similar to 60S ribosomal protein L7a, transcript variant 3 (LOC388474), mRNA.	-1.1707	0.0627074
FTHL7	Homo sapiens ferritin, heavy polypeptide-like 7 (FTHL7) on chromosome 13.	-1.6278	0.0628563
SCAMP1	Homo sapiens secretory carrier membrane protein 1 (SCAMP1), mRNA.	-1.1408	0.0629457	Double layer of lipid molecules that encloses all cells, and, in eukaryotes, many organelles; may be a single or double lipid bilayer; also includes associated proteins [goid 16020] [evidence IEA]; Penetrating at least one phospholipid bilayer of a membrane. May also refer to the state of being buried in the bilayer with no exposure outside the bilayer. When used to describe a protein, indicates …	A process of secretion by a cell that results in the release of intracellular molecules (e.g. hormones, matrix proteins) contained within a membrane-bounded vesicle by fusion of the vesicle with the plasma membrane of a cell. This is the process whereby most molecules are secreted from eukaryotic cells [goid 6887] [evidence IEA]; The directed movement of substances from the Golgi to other parts o…
SNRK	Homo sapiens SNF related kinase (SNRK), mRNA.	1.1869	0.0632734	A membrane-bounded organelle of eukaryotic cells in which chromosomes are housed and replicated. In most cells, the nucleus contains all of the cell's chromosomes except the organellar chromosomes, and is the site of RNA synthesis and processing. In some species, or in specialized cell types, RNA metabolism or DNA replication may be absent [goid 5634] [evidence ISS]	The process of introducing a phosphate group on to a protein [goid 6468] [pmid 12234663] [evidence IDA]; The process whereby a relatively unspecialized myeloid precursor cell acquires the specialized features of any cell of the myeloid leukocyte, megakaryocyte, thrombocyte, or erythrocyte lineages [goid 30099] [pmid 12234663] [evidence TAS]	Interacting selectively with a nucleotide, any compound consisting of a nucleoside that is esterified with (ortho)phosphate or an oligophosphate at any hydroxyl group on the ribose or deoxyribose moiety [goid 166] [evidence IEA]; Interacting selectively with magnesium (Mg) ions [goid 287] [pmid 12234663] [evidence IDA]; Catalysis of the reaction: ATP + a protein serine/threonine = ADP + protein s…
HS.569718	BX115170 Soares_total_fetus_Nb2HF8_9w Homo sapiens cDNA clone IMAGp998A044255, mRNA sequence	-1.2095	0.0633224
LOC642621	PREDICTED: Homo sapiens hypothetical protein LOC642621 (LOC642621), mRNA.	-1.1512	0.0634246
BCCIP	Homo sapiens BRCA2 and CDKN1A interacting protein (BCCIP), transcript variant C, mRNA.	1.1595	0.0634614	A membrane-bounded organelle of eukaryotic cells in which chromosomes are housed and replicated. In most cells, the nucleus contains all of the cell's chromosomes except the organellar chromosomes, and is the site of RNA synthesis and processing. In some species, or in specialized cell types, RNA metabolism or DNA replication may be absent [goid 5634] [pmid 10878006] [evidence TAS]	Any process that modulates the frequency, rate or extent of CDK activity [goid 79] [pmid 10878006] [evidence TAS]; The process of restoring DNA after damage. Genomes are subject to damage by chemical and physical agents in the environment (e.g. UV and ionizing radiations, chemical mutagens, fungal and bacterial toxins, etc.) and by free radicals or alkylating agents endogenously generated in meta…	Interacting selectively with any protein or protein complex (a complex of two or more proteins that may include other nonprotein molecules) [goid 5515] [pmid 17353931] [evidence IPI]
LOC644732	PREDICTED: Homo sapiens similar to ATPase, Cu++ transporting, alpha polypeptide (LOC644732), mRNA.	1.1618	0.0641865
ZNF589	Homo sapiens zinc finger protein 589 (ZNF589), mRNA.	1.1506	0.0652111	The living contents of a cell; the matter contained within (but not including) the plasma membrane, usually taken to exclude large vacuoles and masses of secretory or ingested material. In eukaryotes it includes the nucleus and cytoplasm [goid 5622] [evidence IEA]; A membrane-bounded organelle of eukaryotic cells in which chromosomes are housed and replicated. In most cells, the nucleus contains …	Any process that modulates the frequency, rate or extent of DNA-dependent transcription [goid 6355] [evidence IEA]	Interacting selectively with DNA (deoxyribonucleic acid) [goid 3677] [evidence IEA]; Interacting selectively with zinc (Zn) ions [goid 8270] [evidence IEA]; Interacting selectively with any metal ion [goid 46872] [evidence IEA]
HS.374460	AGENCOURT_7761579 NIH_MGC_70 Homo sapiens cDNA clone IMAGE:6020085 5, mRNA sequence	1.1309	0.0653415
LOC653324	PREDICTED: Homo sapiens similar to ATP synthase, H+ transporting, mitochondrial F0 complex, subunit f isoform 2b (LOC653324), mRNA.	-1.1305	0.0654004
TMEM151A	Homo sapiens transmembrane protein 151A (TMEM151A), mRNA.	1.1833	0.0654098	Double layer of lipid molecules that encloses all cells, and, in eukaryotes, many organelles; may be a single or double lipid bilayer; also includes associated proteins [goid 16020] [evidence IEA]; Penetrating at least one phospholipid bilayer of a membrane. May also refer to the state of being buried in the bilayer with no exposure outside the bilayer. When used to describe a protein, indicates …
LOC642428	PREDICTED: Homo sapiens hypothetical protein LOC642428 (LOC642428), mRNA.	-1.1629	0.0655573
ANKRD13D	PREDICTED: Homo sapiens ankyrin repeat domain 13 family, member D, transcript variant 7 (ANKRD13D), mRNA.	-1.1664	0.0658376
NCOA6	Homo sapiens nuclear receptor coactivator 6 (NCOA6), mRNA.	-1.1799	0.0660244	A membrane-bounded organelle of eukaryotic cells in which chromosomes are housed and replicated. In most cells, the nucleus contains all of the cell's chromosomes except the organellar chromosomes, and is the site of RNA synthesis and processing. In some species, or in specialized cell types, RNA metabolism or DNA replication may be absent [goid 5634] [pmid 18029348] [evidence IDA]; A small, dens…	The process whose specific outcome is the progression of the embryo in the uterus over time, from formation of the zygote in the oviduct, to birth [goid 1701] [evidence ISS]; The process whereby new strands of DNA are synthesized. The template for replication can either be an existing DNA molecule or RNA [goid 6260] [pmid 11443112] [evidence NAS]; The process of restoring DNA after damage. Genome…	Interacting selectively with chromatin, the network of fibers of DNA and protein that make up the chromosomes of the eukaryotic nucleus during interphase [goid 3682] [evidence ISS]; Interacting selectively with any protein or protein complex (a complex of two or more proteins that may include other nonprotein molecules) [goid 5515] [pmid 11443112] [evidence IPI]; Interacting selectively with an e…
BEST4	Homo sapiens bestrophin 4 (BEST4), mRNA.	-1.1844	0.0660451	The membrane surrounding a cell that separates the cell from its external environment. It consists of a phospholipid bilayer and associated proteins [goid 5886] [evidence IEA]; Penetrating at least one phospholipid bilayer of a membrane. May also refer to the state of being buried in the bilayer with no exposure outside the bilayer. When used to describe a protein, indicates that all or part of t…	The directed movement of charged atoms or small charged molecules into, out of, within or between cells [goid 6811] [evidence IEA]; Any process specifically pertinent to the functioning of integrated living units: cells, tissues, organs, and organisms. A process is a collection of molecular events with a defined beginning and end [goid 8150] [evidence ND ]	Elemental activities, such as catalysis or binding, describing the actions of a gene product at the molecular level. A given gene product may exhibit one or more molecular functions [goid 3674] [evidence ND ]; Catalysis of facilitated diffusion of an ion (by an energy-independent process) by passage through a transmembrane aqueous pore or channel without evidence for a carrier-mediated mechanism …
LOC387930	PREDICTED: Homo sapiens misc_RNA (LOC387930), miscRNA.	-1.2863	0.0661652
HS.426929	UI-H-FG0-bcw-h-18-0-UI.s1 NCI_CGAP_EN1_2 Homo sapiens cDNA clone UI-H-FG0-bcw-h-18-0-UI 3, mRNA sequence	1.1799	0.0663729
HS.572999	BX111671 NCI_CGAP_Pr28 Homo sapiens cDNA clone IMAGp998C205228, mRNA sequence	-1.1305	0.0665643
LOC732172	PREDICTED: Homo sapiens hypothetical protein LOC732172 (LOC732172), mRNA.	-1.136	0.0666629
LOC646879	PREDICTED: Homo sapiens similar to ADP-ribosylation factor-like 2 binding protein isoform 1 (LOC646879), mRNA.	1.1664	0.0676522
LOC731837	PREDICTED: Homo sapiens hypothetical protein LOC731837 (LOC731837), mRNA.	-1.1277	0.0677228
LOC730242	PREDICTED: Homo sapiens hypothetical protein LOC730242 (LOC730242), mRNA.	1.1422	0.0677966
FDPSL2A	Homo sapiens MGC44478 (FDPSL2A), non-coding RNA.	1.1662	0.0682802
LOC650961	PREDICTED: Homo sapiens hypothetical LOC650961 (LOC650961), mRNA.	1.1456	0.0685436
PVRL3	Homo sapiens poliovirus receptor-related 3 (PVRL3), mRNA.	-1.1744	0.0686944	The membrane surrounding a cell that separates the cell from its external environment. It consists of a phospholipid bilayer and associated proteins [goid 5886] [evidence IEA]; The membrane surrounding a cell that separates the cell from its external environment. It consists of a phospholipid bilayer and associated proteins [goid 5886] [evidence ISS]; An adherens junction which connects two cells…	The attachment of an adhesion molecule in one cell to an identical molecule in an adjacent cell [goid 7156] [evidence IEA]; The attachment of an adhesion molecule in one cell to an identical molecule in an adjacent cell [goid 7156] [evidence ISS]	Interacting selectively with any protein or protein complex (a complex of two or more proteins that may include other nonprotein molecules) [goid 5515] [evidence IEA]; Interacting selectively with any protein or protein complex (a complex of two or more proteins that may include other nonprotein molecules) [goid 5515] [evidence ISS]; Interacting selectively with an identical protein to form a hom…
HS.555512	ql57c09.x1 Soares_NhHMPu_S1 Homo sapiens cDNA clone IMAGE:1876432 3, mRNA sequence	-1.1488	0.0689695
KRT78	Homo sapiens keratin 78 (KRT78), mRNA.	-1.1589	0.0691786	A filament composed of acidic and basic keratins (types I and II), typically expressed in epithelial cells. The keratins are the most diverse classes of IF proteins, with a large number of keratin isoforms being expressed. Each type of epithelium always expresses a characteristic combination of type I and type II keratins [goid 45095] [evidence IEA]		The action of a molecule that contributes to the structural integrity of a complex or assembly within or outside a cell [goid 5198] [evidence IEA]; Interacting selectively with any protein or protein complex (a complex of two or more proteins that may include other nonprotein molecules) [goid 5515] [pmid 17353931] [evidence IPI]
LOC651655	PREDICTED: Homo sapiens similar to maternally expressed 3 (LOC651655), mRNA.	-1.1216	0.0691802
HS.582640	DKFZp686P0649_s1 686 (synonym: hlcc3) Homo sapiens cDNA clone DKFZp686P0649 3, mRNA sequence	1.1196	0.0694035
LOC644063	PREDICTED: Homo sapiens similar to heterogeneous nuclear ribonucleoprotein K (LOC644063), mRNA.	-1.2008	0.0695345
DAPK2	Homo sapiens death-associated protein kinase 2 (DAPK2), mRNA.	1.1665	0.0697197	All of the contents of a cell excluding the plasma membrane and nucleus, but including other subcellular structures [goid 5737] [pmid 10376525] [evidence IDA]	The process of introducing a phosphate group on to a protein [goid 6468] [pmid 10376525] [evidence IDA]; A form of programmed cell death induced by external or internal signals that trigger the activity of proteolytic caspases, whose actions dismantle the cell and result in cell death. Apoptosis begins internally with condensation and subsequent fragmentation of the cell nucleus (blebbing) while …	Interacting selectively with a nucleotide, any compound consisting of a nucleoside that is esterified with (ortho)phosphate or an oligophosphate at any hydroxyl group on the ribose or deoxyribose moiety [goid 166] [evidence IEA]; Catalysis of the reaction: ATP + a protein serine/threonine = ADP + protein serine/threonine phosphate, dependent on the presence of calcium-bound calmodulin [goid 4683]…
HS.548146	NISC_gj01g09.x1 NCI_CGAP_Pr28 Homo sapiens cDNA clone IMAGE:3270712 3, mRNA sequence	-1.1443	0.0699605
HS3ST3A1	Homo sapiens heparan sulfate (glucosamine) 3-O-sulfotransferase 3A1 (HS3ST3A1), mRNA.	-1.1822	0.0699906	The lipid bilayer surrounding any of the compartments of the Golgi apparatus [goid 139] [evidence IEA]; A compound membranous cytoplasmic organelle of eukaryotic cells, consisting of flattened, ribosome-free vesicles arranged in a more or less regular stack. The Golgi apparatus differs from the endoplasmic reticulum in often having slightly thicker membranes, appearing in sections as a characteri…		Catalysis of the transfer of a sulfate group from 3'-phosphoadenosine 5'-phosphosulfate to the hydroxyl group of an acceptor, producing the sulfated derivative and 3'-phosphoadenosine 5'-phosphate [goid 8146] [pmid 9988767] [evidence TAS]; Catalysis of the transfer of a group, e.g. a methyl group, glycosyl group, acyl group, phosphorus-containing, or other groups, from one compound (generally reg…
GALNT1	Homo sapiens UDP-N-acetyl-alpha-D-galactosamine:polypeptide N-acetylgalactosaminyltransferase 1 (GalNAc-T1) (GALNT1), mRNA.	-1.1607	0.0701134	The space external to the outermost structure of a cell. For cells without external protective or external encapsulating structures this refers to space outside of the plasma membrane. This term covers the host cell environment outside an intracellular parasite [goid 5576] [evidence IEA]; A compound membranous cytoplasmic organelle of eukaryotic cells, consisting of flattened, ribosome-free vesic…	The formation of O-glycans by addition of glycosyl groups either to the hydroxyl group of peptidyl-serine, peptidyl-threonine, peptidyl-hydroxylysine, or peptidyl-hydroxyproline, or to the phenol group of peptidyl-tyrosine [goid 6493] [evidence IEA]; The posttranslational glycosylation of protein via the O3 atom of peptidyl-serine, forming O3-glycosyl-L-serine; the most common forms are N-acetylg…	Catalysis of the reaction: UDP-N-acetyl-D-galactosamine + polypeptide = UDP + N-acetyl-D-galactosaminyl-polypeptide. Catalyzes of the modification of serine or threonine residues in polypeptide chains by the transfer of a N-acetylgalactose from UDP-N-acetylgalactose to the hydroxyl group of the amino acid; it is the first step in O-glycan biosynthesis [goid 4653] [evidence IEA]; Catalysis of the …
THAP2	Homo sapiens THAP domain containing, apoptosis associated protein 2 (THAP2), mRNA.	-1.1193	0.0703732	A small, dense body one or more of which are present in the nucleus of eukaryotic cells. It is rich in RNA and protein, is not bounded by a limiting membrane, and is not seen during mitosis. Its prime function is the transcription of the nucleolar DNA into 45S ribosomal-precursor RNA, the processing of this RNA into 5.8S, 18S, and 28S components of ribosomal RNA, and the association of these comp…		Interacting selectively with DNA (deoxyribonucleic acid) [goid 3677] [evidence IEA]; Interacting selectively with zinc (Zn) ions [goid 8270] [evidence IEA]; Interacting selectively with any metal ion [goid 46872] [evidence IEA]
ZNF76	Homo sapiens zinc finger protein 76 (expressed in testis) (ZNF76), mRNA.	1.2033	0.0703741	The living contents of a cell; the matter contained within (but not including) the plasma membrane, usually taken to exclude large vacuoles and masses of secretory or ingested material. In eukaryotes it includes the nucleus and cytoplasm [goid 5622] [evidence IEA]; A membrane-bounded organelle of eukaryotic cells in which chromosomes are housed and replicated. In most cells, the nucleus contains …	The synthesis of either RNA on a template of DNA or DNA on a template of RNA [goid 6350] [evidence IEA]; Any process that modulates the frequency, rate or extent of transcription from an RNA polymerase II promoter [goid 6357] [pmid 9705341] [evidence TAS]; Any process that modulates the frequency, rate or extent of transcription from an RNA ploymerase III promoter [goid 6359] [pmid 9705341] [evid…	Interacting selectively with DNA (deoxyribonucleic acid) [goid 3677] [evidence IEA]; Interacting selectively with zinc (Zn) ions [goid 8270] [evidence IEA]; Interacting selectively with any metal ion [goid 46872] [evidence IEA]
HS.568407	DA226018 BRAWH3 Homo sapiens cDNA clone BRAWH3019594 5, mRNA sequence	-1.1411	0.0705441
LOC650159	PREDICTED: Homo sapiens hypothetical protein LOC650159 (LOC650159), mRNA.	-1.2041	0.0705877
ZNF611	Homo sapiens zinc finger protein 611 (ZNF611), mRNA.	-1.1465	0.0706397	The living contents of a cell; the matter contained within (but not including) the plasma membrane, usually taken to exclude large vacuoles and masses of secretory or ingested material. In eukaryotes it includes the nucleus and cytoplasm [goid 5622] [evidence IEA]; A membrane-bounded organelle of eukaryotic cells in which chromosomes are housed and replicated. In most cells, the nucleus contains …	The synthesis of either RNA on a template of DNA or DNA on a template of RNA [goid 6350] [evidence IEA]; Any process that modulates the frequency, rate or extent of DNA-dependent transcription [goid 6355] [evidence IEA]	Interacting selectively with DNA (deoxyribonucleic acid) [goid 3677] [evidence IEA]; Interacting selectively with zinc (Zn) ions [goid 8270] [evidence IEA]; Interacting selectively with any metal ion [goid 46872] [evidence IEA]; Interacting selectively with any nucleic acid [goid 3676] [evidence IEA]; Interacting selectively with zinc (Zn) ions [goid 8270] [evidence IEA]
RPS17	Homo sapiens ribosomal protein S17 (RPS17), mRNA.	-1.3031	0.0706442	The living contents of a cell; the matter contained within (but not including) the plasma membrane, usually taken to exclude large vacuoles and masses of secretory or ingested material. In eukaryotes it includes the nucleus and cytoplasm [goid 5622] [evidence IEA]; That part of the cytoplasm that does not contain membranous or particulate subcellular components [goid 5829] [pmid 12588972] [eviden…	The process preceding formation of the peptide bond between the first two amino acids of a protein. This includes the formation of a complex of the ribosome, mRNA, and an initiation complex that contains the first aminoacyl-tRNA [goid 6413] [pmid 17647292] [evidence NAS]; The successive addition of amino acid residues to a nascent polypeptide chain during protein biosynthesis [goid 6414] [pmid 15…	The action of a molecule that contributes to the structural integrity of the ribosome [goid 3735] [pmid 17647292] [evidence NAS]; The action of a molecule that contributes to the structural integrity of the ribosome [goid 3735] [pmid 18412286] [evidence NAS]
FOXO3	Homo sapiens forkhead box O3 (FOXO3), transcript variant 2, mRNA.	1.1427	0.0707912	A membrane-bounded organelle of eukaryotic cells in which chromosomes are housed and replicated. In most cells, the nucleus contains all of the cell's chromosomes except the organellar chromosomes, and is the site of RNA synthesis and processing. In some species, or in specialized cell types, RNA metabolism or DNA replication may be absent [goid 5634] [pmid 16751106] [evidence IDA]; A membrane-bo…	The synthesis of either RNA on a template of DNA or DNA on a template of RNA [goid 6350] [evidence IEA]; Any process that modulates the frequency, rate or extent of DNA-dependent transcription [goid 6355] [evidence IEA]; A form of programmed cell death induced by external or internal signals that trigger the activity of proteolytic caspases, whose actions dismantle the cell and result in cell dea…	The function of binding to a specific DNA sequence in order to modulate transcription. The transcription factor may or may not also interact selectively with a protein or macromolecular complex [goid 3700] [pmid 14734530] [evidence IDA]; Interacting selectively with any protein or protein complex (a complex of two or more proteins that may include other nonprotein molecules) [goid 5515] [pmid 168…
PDPR	PREDICTED: Homo sapiens pyruvate dehydrogenase phosphatase regulatory subunit (PDPR), mRNA.	1.1191	0.0719276	All of the contents of a cell excluding the plasma membrane and nucleus, but including other subcellular structures [goid 5737] [evidence IEA]; A semiautonomous, self replicating organelle that occurs in varying numbers, shapes, and sizes in the cytoplasm of virtually all eukaryotic cells. It is notably the site of tissue respiration [goid 5739] [evidence IEA]; The gel-like material, with conside…	The chemical reactions and pathways resulting in the breakdown of glycine, aminoethanoic acid [goid 6546] [evidence IEA]	Catalysis of the reaction: (6S)-tetrahydrofolate + S-aminomethyldihydrolipoylprotein = (6R)-5,10-methylenetetrahydrofolate + NH3 + dihydrolipoylprotein [goid 4047] [evidence IEA]; Catalysis of an oxidation-reduction (redox) reaction, a reversible chemical reaction in which the oxidation state of an atom or atoms within a molecule is altered. One substrate acts as a hydrogen or electron donor and …
GPR123	Homo sapiens G protein-coupled receptor 123 (GPR123), mRNA.	1.2423	0.0720203	The membrane surrounding a cell that separates the cell from its external environment. It consists of a phospholipid bilayer and associated proteins [goid 5886] [evidence IEA]; Penetrating at least one phospholipid bilayer of a membrane. May also refer to the state of being buried in the bilayer with no exposure outside the bilayer. When used to describe a protein, indicates that all or part of t…	The cascade of processes by which a signal interacts with a receptor, causing a change in the level or activity of a second messenger or other downstream target, and ultimately effecting a change in the functioning of the cell [goid 7165] [evidence IEA]; The series of molecular signals generated as a consequence of a G-protein coupled receptor binding to its physiological ligand [goid 7186] [evid…	Combining with an extracellular or intracellular messenger to initiate a change in cell activity [goid 4872] [evidence IEA]; A receptor that binds an extracellular ligand and transmits the signal to a heterotrimeric G-protein complex. These receptors are characteristically seven-transmembrane receptors and are made up of hetero- or homodimers [goid 4930] [evidence IEA]
KCNC4	Homo sapiens potassium voltage-gated channel, Shaw-related subfamily, member 4 (KCNC4), transcript variant 1, mRNA.	-1.2554	0.0720285	A protein complex that forms a transmembrane channel through which potassium ions may cross a cell membrane in response to changes in membrane potential [goid 8076] [pmid 1920536] [evidence TAS]; Double layer of lipid molecules that encloses all cells, and, in eukaryotes, many organelles; may be a single or double lipid bilayer; also includes associated proteins [goid 16020] [evidence IEA]; Penet…	The directed movement of charged atoms or small charged molecules into, out of, within or between cells [goid 6811] [evidence IEA]; The directed movement of potassium ions (K+) into, out of, within or between cells [goid 6813] [pmid 1920536] [evidence TAS]; The process of communication from a neuron to a target (neuron, muscle, or secretory cell) across a synapse [goid 7268] [pmid 1381835] [evide…	Catalysis of the transmembrane transfer of an ion by a voltage-gated channel. An ion is an atom or group of atoms carrying an electric charge by virtue of having gained or lost one or more electrons [goid 5244] [evidence IEA]; Catalysis of the transmembrane transfer of a potassium ion by a voltage-gated channel [goid 5249] [pmid 1920536] [evidence TAS]; Interacting selectively with any protein or…
ZNF807	PREDICTED: Homo sapiens zinc finger protein 807 (ZNF807), mRNA.	-1.2053	0.0720781
HS.543377	17000424718959 GRN_ES Homo sapiens cDNA 5, mRNA sequence	-1.1726	0.0721519
MFSD8	Homo sapiens major facilitator superfamily domain containing 8 (MFSD8), mRNA.	1.2047	0.0721781	The lipid bilayer surrounding the lysosome and separating its contents from the cell cytoplasm [goid 5765] [evidence IEA]; Double layer of lipid molecules that encloses all cells, and, in eukaryotes, many organelles; may be a single or double lipid bilayer; also includes associated proteins [goid 16020] [evidence IEA]; Penetrating at least one phospholipid bilayer of a membrane. May also refer to…	The directed movement of substances (such as macromolecules, small molecules, ions) into, out of, within or between cells, or within a multicellular organism [goid 6810] [evidence IEA]	Enables the directed movement of substances (such as macromolecules, small molecules, ions) into, out of, within or between cells [goid 5215] [evidence IEA]
GLS2	Homo sapiens glutaminase 2 (liver, mitochondrial) (GLS2), nuclear gene encoding mitochondrial protein, mRNA.	-1.1712	0.0725236	A semiautonomous, self replicating organelle that occurs in varying numbers, shapes, and sizes in the cytoplasm of virtually all eukaryotic cells. It is notably the site of tissue respiration [goid 5739] [pmid 10620514] [evidence TAS]; The gel-like material, with considerable fine structure, that lies in the matrix space, or lumen, of a mitochondrion. It contains the enzymes of the tricarboxylic …	The chemical reactions and pathways involving amino acids, organic acids containing one or more amino substituents [goid 6520] [pmid 10620514] [evidence TAS]; The chemical reactions and pathways involving glutamine, 2-amino-4-carbamoylbutanoic acid [goid 6541] [evidence IEA]; The chemical reactions and pathways involving glutamine, 2-amino-4-carbamoylbutanoic acid [goid 6541] [evidence IEA]	Catalysis of the reaction: L-glutamine + H2O = L-glutamate + NH3 [goid 4359] [pmid 10620514] [evidence EXP]; Catalysis of the reaction: L-glutamine + H2O = L-glutamate + NH3 [goid 4359] [pmid 10620514] [evidence TAS]; Interacting selectively with any protein or protein complex (a complex of two or more proteins that may include other nonprotein molecules) [goid 5515] [pmid 11163757] [evidence IPI…
ZDHHC5	Homo sapiens zinc finger, DHHC-type containing 5 (ZDHHC5), mRNA.	-1.2096	0.0727512	Double layer of lipid molecules that encloses all cells, and, in eukaryotes, many organelles; may be a single or double lipid bilayer; also includes associated proteins [goid 16020] [evidence IEA]; Penetrating at least one phospholipid bilayer of a membrane. May also refer to the state of being buried in the bilayer with no exposure outside the bilayer. When used to describe a protein, indicates …		Interacting selectively with zinc (Zn) ions [goid 8270] [evidence IEA]; Catalysis of the generalized reaction: acyl-carrier + reactant = acyl-reactant + carrier [goid 8415] [evidence IEA]; Catalysis of the transfer of a group, e.g. a methyl group, glycosyl group, acyl group, phosphorus-containing, or other groups, from one compound (generally regarded as the donor) to another compound (generally …
PROKR2	Homo sapiens prokineticin receptor 2 (PROKR2), mRNA.	1.1226	0.0731492	The membrane surrounding a cell that separates the cell from its external environment. It consists of a phospholipid bilayer and associated proteins [goid 5886] [evidence IEA]; Penetrating at least one phospholipid bilayer of a membrane. May also refer to the state of being buried in the bilayer with no exposure outside the bilayer. When used to describe a protein, indicates that all or part of t…	The cascade of processes by which a signal interacts with a receptor, causing a change in the level or activity of a second messenger or other downstream target, and ultimately effecting a change in the functioning of the cell [goid 7165] [evidence IEA]; The series of molecular signals generated as a consequence of a G-protein coupled receptor binding to its physiological ligand [goid 7186] [evid…	Combining with an extracellular or intracellular messenger to initiate a change in cell activity [goid 4872] [evidence IEA]; Combining with neuropeptide Y to initiate a change in cell activity [goid 4983] [evidence IEA]
LOC440992	PREDICTED: Homo sapiens similar to 40S ribosomal protein S20 (LOC440992), mRNA.	-1.1796	0.0736801
SURF2	Homo sapiens surfeit 2 (SURF2), mRNA.	1.1179	0.0738533	The part of a cell or its extracellular environment in which a gene product is located. A gene product may be located in one or more parts of a cell and its location may be as specific as a particular macromolecular complex, that is, a stable, persistent association of macromolecules that function together [goid 5575] [evidence ND ]	Any process specifically pertinent to the functioning of integrated living units: cells, tissues, organs, and organisms. A process is a collection of molecular events with a defined beginning and end [goid 8150] [evidence ND ]	Elemental activities, such as catalysis or binding, describing the actions of a gene product at the molecular level. A given gene product may exhibit one or more molecular functions [goid 3674] [evidence ND ]
LOC88523	Homo sapiens CG016 (LOC88523), mRNA.	1.1978	0.0742057
LOC650188	PREDICTED: Homo sapiens hypothetical protein LOC650188 (LOC650188), mRNA.	1.1191	0.0743308
LRRC15	Homo sapiens leucine rich repeat containing 15 (LRRC15), mRNA.	1.1101	0.0743472	Double layer of lipid molecules that encloses all cells, and, in eukaryotes, many organelles; may be a single or double lipid bilayer; also includes associated proteins [goid 16020] [evidence IEA]; Penetrating at least one phospholipid bilayer of a membrane. May also refer to the state of being buried in the bilayer with no exposure outside the bilayer. When used to describe a protein, indicates …		Interacting selectively with any protein or protein complex (a complex of two or more proteins that may include other nonprotein molecules) [goid 5515] [evidence IEA]
PHF7	Homo sapiens PHD finger protein 7 (PHF7), transcript variant 2, mRNA.	-1.1255	0.075009	A membrane-bounded organelle of eukaryotic cells in which chromosomes are housed and replicated. In most cells, the nucleus contains all of the cell's chromosomes except the organellar chromosomes, and is the site of RNA synthesis and processing. In some species, or in specialized cell types, RNA metabolism or DNA replication may be absent [goid 5634] [evidence IEA]		Interacting selectively with any protein or protein complex (a complex of two or more proteins that may include other nonprotein molecules) [goid 5515] [evidence IEA]; Interacting selectively with zinc (Zn) ions [goid 8270] [evidence IEA]; Interacting selectively with any metal ion [goid 46872] [evidence IEA]; Interacting selectively with any protein or protein complex (a complex of two or more p…
MATK	Homo sapiens megakaryocyte-associated tyrosine kinase (MATK), transcript variant 3, mRNA.	-1.117	0.075442	A membrane-bounded organelle of eukaryotic cells in which chromosomes are housed and replicated. In most cells, the nucleus contains all of the cell's chromosomes except the organellar chromosomes, and is the site of RNA synthesis and processing. In some species, or in specialized cell types, RNA metabolism or DNA replication may be absent [goid 5634] [pmid 18029348] [evidence IDA]; All of the co…	The process of introducing a phosphate group on to a protein [goid 6468] [pmid 7530249] [evidence TAS]; The process whose specific outcome is the progression of the mesoderm over time, from its formation to the mature structure. The mesoderm is the middle germ layer that develops into muscle, bone, cartilage, blood and connective tissue [goid 7498] [pmid 8288563] [evidence TAS]; Any process that …	Interacting selectively with a nucleotide, any compound consisting of a nucleoside that is esterified with (ortho)phosphate or an oligophosphate at any hydroxyl group on the ribose or deoxyribose moiety [goid 166] [evidence IEA]; Catalysis of the reaction: ATP + a protein-L-tyrosine = ADP + a protein-L-tyrosine phosphate [goid 4715] [evidence IEA]; Interacting selectively with any protein or prot…
PRO0628	Homo sapiens hypothetical LOC29053 (PRO0628), non-coding RNA.	-1.1335	0.0764083
HS.214491	qy58g05.x1 NCI_CGAP_Brn23 Homo sapiens cDNA clone IMAGE:2016248 3, mRNA sequence	-1.1293	0.0764352
LOC647190	PREDICTED: Homo sapiens similar to 40S ribosomal protein S16 (LOC647190), mRNA.	1.3055	0.0768959
C17ORF28	Homo sapiens chromosome 17 open reading frame 28 (C17orf28), mRNA.	-1.1378	0.0771381	Double layer of lipid molecules that encloses all cells, and, in eukaryotes, many organelles; may be a single or double lipid bilayer; also includes associated proteins [goid 16020] [evidence IEA]; Penetrating at least one phospholipid bilayer of a membrane. May also refer to the state of being buried in the bilayer with no exposure outside the bilayer. When used to describe a protein, indicates …
TBP	Homo sapiens TATA box binding protein (TBP), mRNA.	-1.1415	0.0774633	A membrane-bounded organelle of eukaryotic cells in which chromosomes are housed and replicated. In most cells, the nucleus contains all of the cell's chromosomes except the organellar chromosomes, and is the site of RNA synthesis and processing. In some species, or in specialized cell types, RNA metabolism or DNA replication may be absent [goid 5634] [evidence IEA]; A complex composed of TATA bi…	Any process that modulates the frequency, rate or extent of DNA-dependent transcription [goid 6355] [evidence IEA]; Any process involved in starting transcription from the RNA polymerase II promoter [goid 6367] [evidence IEA]; Any process that modulates the frequency, rate or extent of DNA-dependent transcription [goid 6355] [evidence IEA]; Any process involved in starting transcription from the …	Interacting selectively with DNA (deoxyribonucleic acid) [goid 3677] [evidence IEA]; Functions to initiate or regulate RNA polymerase II transcription [goid 3702] [evidence IEA]; The selective, often stoichiometric, interaction of a molecule with one or more specific sites on another molecule [goid 5488] [evidence IEA]; Interacting selectively with DNA (deoxyribonucleic acid) [goid 3677] [evidenc…
WIPF1	Homo sapiens WAS/WASL interacting protein family, member 1 (WIPF1), transcript variant 2, mRNA.	-1.1508	0.0777406	All of the contents of a cell excluding the plasma membrane and nucleus, but including other subcellular structures [goid 5737] [evidence IEA]; The part of the cytoskeleton (the internal framework of a cell) composed of actin and associated proteins. Includes actin cytoskeleton-associated complexes [goid 15629] [evidence IEA]; The part of the cytoskeleton (the internal framework of a cell) compos…	The aggregation, arrangement and bonding together of a set of components to form a protein complex [goid 6461] [pmid 9405671] [evidence TAS]; Assembly or disassembly of actin filaments by the addition or removal of actin monomers from a filament [goid 8154] [pmid 9405671] [evidence TAS]; Movement of organelles or other particles along actin filaments, or sliding of actin filaments past each other…	Interacting selectively with monomeric or multimeric forms of actin, including actin filaments [goid 3779] [pmid 9405671] [evidence TAS]; Interacting selectively with profilin, an actin-binding protein that forms a complex with G-actin and prevents it from polymerizing to form F-actin [goid 5522] [pmid 9405671] [evidence TAS]
LOC286411	PREDICTED: Homo sapiens hypothetical protein LOC286411 (LOC286411), mRNA.	-1.2762	0.077815
CCNE1	Homo sapiens cyclin E1 (CCNE1), transcript variant 2, mRNA.	1.1325	0.0779818	A membrane-bounded organelle of eukaryotic cells in which chromosomes are housed and replicated. In most cells, the nucleus contains all of the cell's chromosomes except the organellar chromosomes, and is the site of RNA synthesis and processing. In some species, or in specialized cell types, RNA metabolism or DNA replication may be absent [goid 5634] [evidence NAS]; That part of the nuclear cont…	Progression from G1 phase to S phase of the mitotic cell cycle [goid 82] [pmid 8207080] [evidence NAS]; The progression of biochemical and morphological phases and events that occur in a cell during successive cell replication or nuclear replication events. Canonically, the cell cycle comprises the replication and segregation of genetic material followed by the division of the cell, but in endocy…	The function of a transcription cofactor that activates transcription from a RNA polymerase II promoter; does not bind DNA itself [goid 3713] [pmid 15572661] [evidence NAS]; Interacting selectively with any protein or protein complex (a complex of two or more proteins that may include other nonprotein molecules) [goid 5515] [pmid 9891079] [evidence IPI]; Interacting selectively with an androgen r…
SOX14	Homo sapiens SRY (sex determining region Y)-box 14 (SOX14), mRNA.	-1.1149	0.0780113	The ordered and organized complex of DNA and protein that forms the chromosome [goid 785] [evidence IEA]; A membrane-bounded organelle of eukaryotic cells in which chromosomes are housed and replicated. In most cells, the nucleus contains all of the cell's chromosomes except the organellar chromosomes, and is the site of RNA synthesis and processing. In some species, or in specialized cell types,…	The synthesis of either RNA on a template of DNA or DNA on a template of RNA [goid 6350] [evidence IEA]; Any process that modulates the frequency, rate or extent of DNA-dependent transcription [goid 6355] [evidence IEA]; The process whose specific outcome is the progression of nervous tissue over time, from its formation to its mature state [goid 7399] [pmid 9925951] [evidence TAS]	The function of binding to a specific DNA sequence in order to modulate transcription. The transcription factor may or may not also interact selectively with a protein or macromolecular complex [goid 3700] [pmid 9925951] [evidence TAS]
ZNF74	Homo sapiens zinc finger protein 74 (ZNF74), transcript variant 2, transcribed RNA.	1.1993	0.0784133	The living contents of a cell; the matter contained within (but not including) the plasma membrane, usually taken to exclude large vacuoles and masses of secretory or ingested material. In eukaryotes it includes the nucleus and cytoplasm [goid 5622] [evidence IEA]; A membrane-bounded organelle of eukaryotic cells in which chromosomes are housed and replicated. In most cells, the nucleus contains …	The synthesis of either RNA on a template of DNA or DNA on a template of RNA [goid 6350] [evidence IEA]; Any process that modulates the frequency, rate or extent of DNA-dependent transcription [goid 6355] [pmid 1639391] [evidence TAS]; The biological process whose specific outcome is the progression of a multicellular organism over time from an initial condition (e.g. a zygote or a young adult) t…	Interacting selectively with DNA (deoxyribonucleic acid) [goid 3677] [evidence IEA]; Interacting selectively with an RNA molecule or a portion thereof [goid 3723] [evidence IEA]; Interacting selectively with zinc (Zn) ions [goid 8270] [evidence IEA]; Interacting selectively with any metal ion [goid 46872] [evidence IEA]
LOC100130990	PREDICTED: Homo sapiens misc_RNA (LOC100130990), miscRNA.	-1.1156	0.078517
TUBGCP4	Homo sapiens tubulin, gamma complex associated protein 4 (TUBGCP4), mRNA.	-1.1165	0.0785659	Either of the ends of a spindle, where spindle microtubules are organized; usually contains a microtubule organizing center and accessory molecules, spindle microtubules and astral microtubules [goid 922] [evidence IEA]; A structure comprised of a core structure (in most organisms, a pair of centrioles) and peripheral material from which a microtubule-based structure, such as a spindle apparatus,…	The aggregation, arrangement and bonding together of a set of components to form a protein complex [goid 6461] [pmid 10562286] [evidence NAS]; The 'de novo' formation of a microtubule, in which tubulin heterodimers form metastable oligomeric aggregates, some of which go on to support formation of a complete microtubule. Microtubule nucleation usually occurs from a specific site within a cell [goi…	The action of a molecule that contributes to the structural integrity of a cytoskeletal structure [goid 5200] [pmid 10562286] [evidence NAS]
FAM126B	Homo sapiens family with sequence similarity 126, member B (FAM126B), mRNA.	-1.1467	0.0787381	The living contents of a cell; the matter contained within (but not including) the plasma membrane, usually taken to exclude large vacuoles and masses of secretory or ingested material. In eukaryotes it includes the nucleus and cytoplasm [goid 5622] [pmid 11256614] [evidence IDA]
DCTN4	Homo sapiens dynactin 4 (p62) (DCTN4), mRNA.	-1.3054	0.0788837	A membrane-bounded organelle of eukaryotic cells in which chromosomes are housed and replicated. In most cells, the nucleus contains all of the cell's chromosomes except the organellar chromosomes, and is the site of RNA synthesis and processing. In some species, or in specialized cell types, RNA metabolism or DNA replication may be absent [goid 5634] [pmid 10671518] [evidence TAS]; All of the co…		Interacting selectively with a protein N-terminus, the end of any peptide chain at which the 2-amino (or 2-imino) function of a constituent amino acid is not attached in peptide linkage to another amino-acid residue [goid 47485] [pmid 16554302] [evidence IPI]
ZDHHC13	Homo sapiens zinc finger, DHHC-type containing 13 (ZDHHC13), transcript variant 1, mRNA.	1.1472	0.0790208	Double layer of lipid molecules that encloses all cells, and, in eukaryotes, many organelles; may be a single or double lipid bilayer; also includes associated proteins [goid 16020] [evidence IEA]; Penetrating at least one phospholipid bilayer of a membrane. May also refer to the state of being buried in the bilayer with no exposure outside the bilayer. When used to describe a protein, indicates …	Any process that activates or increases the frequency, rate or extent of an I-kappaB kinase/NF-kappaB induced cascade [goid 43123] [pmid 12761501] [evidence IMP]	Mediates the transfer of a signal from the outside to the inside of a cell by means other than the introduction of the signal molecule itself into the cell [goid 4871] [pmid 12761501] [evidence IMP]; Interacting selectively with zinc (Zn) ions [goid 8270] [evidence IEA]; Catalysis of the generalized reaction: acyl-carrier + reactant = acyl-reactant + carrier [goid 8415] [evidence IEA]; Catalysis …
LIG1	Homo sapiens ligase I, DNA, ATP-dependent (LIG1), mRNA.	-1.1242	0.0793279	A membrane-bounded organelle of eukaryotic cells in which chromosomes are housed and replicated. In most cells, the nucleus contains all of the cell's chromosomes except the organellar chromosomes, and is the site of RNA synthesis and processing. In some species, or in specialized cell types, RNA metabolism or DNA replication may be absent [goid 5634] [pmid 8696349] [evidence TAS]; That part of t…	The process whereby new strands of DNA are synthesized. The template for replication can either be an existing DNA molecule or RNA [goid 6260] [evidence IEA]; The process of restoring DNA after damage. Genomes are subject to damage by chemical and physical agents in the environment (e.g. UV and ionizing radiations, chemical mutagens, fungal and bacterial toxins, etc.) and by free radicals or alky…	Interacting selectively with a nucleotide, any compound consisting of a nucleoside that is esterified with (ortho)phosphate or an oligophosphate at any hydroxyl group on the ribose or deoxyribose moiety [goid 166] [evidence IEA]; Interacting selectively with DNA (deoxyribonucleic acid) [goid 3677] [pmid 8696349] [evidence TAS]; Catalysis of the reaction: ATP + deoxyribonucleotide(n) + deoxyribonu…
EIF5AL1	Homo sapiens eukaryotic translation initiation factor 5A-like 1 (EIF5AL1), mRNA.	1.1362	0.0801228		The process preceding formation of the peptide bond between the first two amino acids of a protein. This includes the formation of a complex of the ribosome, mRNA, and an initiation complex that contains the first aminoacyl-tRNA [goid 6413] [evidence IEA]	Functions in the initiation of ribosome-mediated translation of mRNA into a polypeptide [goid 3743] [evidence IEA]
HS.543736	oj49h04.s1 NCI_CGAP_Kid3 Homo sapiens cDNA clone IMAGE:1501687 3, mRNA sequence	-1.1179	0.0804141
FLJ39632	PREDICTED: Homo sapiens misc_RNA (FLJ39632), miscRNA.	-1.1228	0.0805027
ANKRD11	Homo sapiens ankyrin repeat domain 11 (ANKRD11), mRNA.	-1.1352	0.0807217	A membrane-bounded organelle of eukaryotic cells in which chromosomes are housed and replicated. In most cells, the nucleus contains all of the cell's chromosomes except the organellar chromosomes, and is the site of RNA synthesis and processing. In some species, or in specialized cell types, RNA metabolism or DNA replication may be absent [goid 5634] [evidence IEA]
SYNPO2	PREDICTED: Homo sapiens synaptopodin 2, transcript variant 2 (SYNPO2), mRNA.	1.1055	0.0809647	A membrane-bounded organelle of eukaryotic cells in which chromosomes are housed and replicated. In most cells, the nucleus contains all of the cell's chromosomes except the organellar chromosomes, and is the site of RNA synthesis and processing. In some species, or in specialized cell types, RNA metabolism or DNA replication may be absent [goid 5634] [evidence IEA]; All of the contents of a cell…		Interacting selectively with monomeric or multimeric forms of actin, including actin filaments [goid 3779] [evidence IEA]; Interacting selectively with any protein or protein complex (a complex of two or more proteins that may include other nonprotein molecules) [goid 5515] [evidence IEA]; Interacting selectively with any protein or protein complex (a complex of two or more proteins that may incl…
